# Supplementary material for: The transcriptional regulator KLF15 is necessary for myoblast differentiation and muscle regeneration by activating FKBP5
Source: PubMed Central journal article supplement (PMC10622842; doi:10.1016/j.jbc.2023.105226), 2023-09-04
Supplement: mmc1.pdf [file mmc1.pdf]

**Table S1 Upregulated genes in Klf15KO muscles at Day 7 after CTX injection**

| Gene      | WT CTX D7<br>Average<br>FPKM | Klf15KO CTX D7<br>Average FPKM | log2<br>(Klf15KO/WTD7) | Qvalue (WT-<br>vs-Klf15KO) | Pvalue (WT-vs-<br>Klf15KO) |
|-----------|------------------------------|--------------------------------|------------------------|----------------------------|----------------------------|
| Gm9840    | 0                            | 5.9                            | 8.12                   | 4.86E-30                   | 1.66E-30                   |
| Gm21541   | 0                            | 2.5                            | 7.69                   | 1.31E-23                   | 5.45E-24                   |
| Ccl21c    | 0                            | 2.5                            | 7.69                   | 1.31E-23                   | 5.45E-24                   |
| Hbb-b1    | 0.2                          | 42.6                           | 7.53                   | 1.02E-266                  | 4.55E-268                  |
| Rps27rt   | 0                            | 5.1                            | 7.4                    | 5.15E-20                   | 2.40E-20                   |
| Hist1h2ao | 0                            | 1.6                            | 6.37                   | 4.15E-11                   | 2.95E-11                   |
| Hbb-b2    | 0.1                          | 4.1                            | 6.24                   | 3.83E-29                   | 1.34E-29                   |
| Prnd      | 0.2                          | 11.5                           | 5.69                   | 0                          | 0                          |
| Bglap2    | 0                            | 2.3                            | 5.6                    | 6.80E-13                   | 4.37E-13                   |
| Cenpm     | 0.1                          | 1.3                            | 4.93                   | 1.68E-15                   | 9.56E-16                   |
| Gm3646    | 0.1                          | 1.9                            | 4.91                   | 2.14E-08                   | 1.81E-08                   |
| Apln      | 0.1                          | 2.4                            | 4.81                   | 3.40E-84                   | 4.64E-85                   |
| Mxd3      | 0.1                          | 1.4                            | 4.4                    | 7.37E-21                   | 3.34E-21                   |
| Nuf2      | 0.1                          | 1.3                            | 4.28                   | 3.08E-31                   | 1.02E-31                   |
| Apol9a    | 0.1                          | 1.1                            | 4.25                   | 3.14E-18                   | 1.57E-18                   |
| Grem2     | 0.1                          | 1.7                            | 4.24                   | 1.06E-66                   | 1.80E-67                   |
| Gm2573    | 0.3                          | 5.9                            | 4.2                    | 2.86E-49                   | 6.31E-50                   |
| Ms4a4c    | 0.1                          | 1.1                            | 4.18                   | 6.91E-21                   | 3.13E-21                   |
| Ly6h      | 0.2                          | 3.6                            | 4.14                   | 7.45E-39                   | 2.04E-39                   |
| Gm266     | 0.1                          | 1.4                            | 4.05                   | 6.28E-19                   | 3.04E-19                   |
| Cxcl9     | 0.2                          | 3.6                            | 4.03                   | 4.60E-106                  | 5.02E-107                  |
| Hist1h2ap | 1.6                          | 22.9                           | 3.88                   | 7.95E-97                   | 9.40E-98                   |
| Cend1     | 0.4                          | 5.3                            | 3.85                   | 1.85E-201                  | 1.06E-202                  |
| Apol9b    | 0.1                          | 1.7                            | 3.81                   | 8.10E-27                   | 3.03E-27                   |
| Mest      | 4                            | 57                             | 3.8                    | 0                          | 0                          |
| Frzb      | 0.5                          | 6.3                            | 3.75                   | 5.89E-178                  | 3.80E-179                  |
| Lst1      | 0.8                          | 10.2                           | 3.68                   | 2.92E-39                   | 7.93E-40                   |
| Mki67     | 0.1                          | 1.4                            | 3.63                   | 4.06E-122                  | 3.81E-123                  |
| Ptn       | 1.3                          | 14.9                           | 3.56                   | 2.17E-186                  | 1.33E-187                  |
| Ifit3b    | 0.3                          | 3.2                            | 3.55                   | 3.65E-60                   | 6.75E-61                   |
| Oas1a     | 0.3                          | 3.6                            | 3.5                    | 2.68E-55                   | 5.33E-56                   |
| Ifit3     | 0.8                          | 9.2                            | 3.47                   | 6.39E-165                  | 4.48E-166                  |
| Ccl12     | 0.1                          | 1.3                            | 3.46                   | 9.97E-08                   | 8.84E-08                   |
| Actc1     | 207.5                        | 2247                           | 3.45                   | 0                          | 0                          |
| Top2a     | 0.2                          | 1.9                            | 3.36                   | 5.39E-88                   | 7.09E-89                   |
| Col15a1   | 2.7                          | 26.8                           | 3.35                   | 0                          | 0                          |
| Oas2      | 0.3                          | 3                              | 3.27                   | 7.71E-102                  | 8.67E-103                  |
| Map2k6    | 1.1                          | 10                             | 3.25                   | 7.13E-214                  | 3.77E-215                  |
| Aplnr     | 1.8                          | 16.7                           | 3.23                   | 0                          | 0                          |
| Phf11d    | 0.2                          | 2.2                            | 3.23                   | 1.59E-52                   | 3.32E-53                   |
| Ifi44     | 0.2                          | 2.2                            | 3.2                    | 1.01E-54                   | 2.03E-55                   |
| Cdk1      | 0.2                          | 1.5                            | 3.17                   | 1.45E-37                   | 4.09E-38                   |
| Ccna2     | 0.4                          | 3.5                            | 3.16                   | 4.08E-85                   | 5.55E-86                   |

|               |      |       |      |           |           |
|---------------|------|-------|------|-----------|-----------|
| Oasl2         | 1.4  | 12.4  | 3.12 | 1.30E-219 | 6.71E-221 |
| Chga          | 0.2  | 1.6   | 3.11 | 1.06E-26  | 3.99E-27  |
| Mybphl        | 0.3  | 2.4   | 3.08 | 5.75E-26  | 2.20E-26  |
| Fcrls         | 0.4  | 3.2   | 3.06 | 2.15E-53  | 4.42E-54  |
| Cntnap2       | 0.1  | 1.1   | 3.06 | 5.14E-31  | 1.72E-31  |
| Ifit1         | 0.5  | 3.7   | 3.04 | 3.33E-81  | 4.66E-82  |
| Th            | 0.2  | 1.3   | 3.04 | 1.83E-19  | 8.73E-20  |
| Xlr3b         | 0.5  | 4.3   | 3.02 | 2.48E-55  | 4.92E-56  |
| Cxcl10        | 0.4  | 3.5   | 3.02 | 1.10E-32  | 3.48E-33  |
| Tbxa2r        | 0.1  | 1     | 3.02 | 2.45E-16  | 1.33E-16  |
| Aif1          | 0.7  | 6     | 3.01 | 5.02E-43  | 1.25E-43  |
| Isg15         | 1.1  | 8.5   | 2.96 | 1.24E-50  | 2.66E-51  |
| Hist1h3e      | 0.1  | 1.1   | 2.92 | 4.55E-05  | 5.11E-05  |
| Zbp1          | 0.3  | 2.5   | 2.9  | 9.35E-28  | 3.41E-28  |
| Dctd          | 0.2  | 1.6   | 2.9  | 2.87E-24  | 1.16E-24  |
| Cd72          | 0.3  | 2.3   | 2.89 | 2.77E-24  | 1.12E-24  |
| Ccr5          | 0.2  | 1.1   | 2.89 | 4.90E-27  | 1.82E-27  |
| Hdhd3         | 0.3  | 2.4   | 2.86 | 6.56E-21  | 2.97E-21  |
| Mmp12         | 0.7  | 5.3   | 2.85 | 7.47E-75  | 1.14E-75  |
| Fam64a        | 0.3  | 1.6   | 2.85 | 1.37E-19  | 6.51E-20  |
| Psmb9         | 1.2  | 8.2   | 2.83 | 3.02E-51  | 6.42E-52  |
| Itgax         | 0.5  | 3.2   | 2.83 | 6.80E-100 | 7.83E-101 |
| Meox1         | 0.6  | 4.4   | 2.82 | 2.32E-75  | 3.53E-76  |
| Ky            | 5.3  | 38.2  | 2.81 | 0         | 0         |
| Usp18         | 0.4  | 2.9   | 2.81 | 1.07E-39  | 2.87E-40  |
| Ifi2712a      | 3.8  | 25.8  | 2.79 | 2.62E-85  | 3.54E-86  |
| Ifit2         | 0.3  | 2.3   | 2.79 | 1.19E-68  | 1.97E-69  |
| Ostn          | 0.2  | 1.3   | 2.79 | 3.15E-13  | 1.98E-13  |
| A830010M20Rik | 0.5  | 3.2   | 2.78 | 7.11E-159 | 5.20E-160 |
| Ms4a4b        | 0.2  | 1.2   | 2.78 | 4.59E-13  | 2.92E-13  |
| Bst2          | 5.8  | 39.2  | 2.77 | 9.29E-247 | 4.32E-248 |
| Pcdh12        | 0.3  | 1.8   | 2.77 | 1.59E-76  | 2.36E-77  |
| Fbxl22        | 1.5  | 9.8   | 2.76 | 1.70E-286 | 7.32E-288 |
| Sox8          | 0.2  | 1.6   | 2.76 | 9.95E-37  | 2.87E-37  |
| Irf7          | 2.3  | 14.8  | 2.73 | 4.20E-199 | 2.43E-200 |
| Tceal7        | 55.3 | 356.6 | 2.71 | 0         | 0         |
| Phf11b        | 0.5  | 3     | 2.71 | 1.52E-28  | 5.45E-29  |
| H2-Ab1        | 10.9 | 69.5  | 2.7  | 0         | 0         |
| Cx3cr1        | 0.3  | 1.6   | 2.7  | 2.06E-46  | 4.78E-47  |
| Dlk1          | 6.5  | 41.4  | 2.69 | 0         | 0         |
| Iigp1         | 1    | 6.8   | 2.67 | 4.04E-144 | 3.25E-145 |
| H2-Q9         | 0.9  | 5.7   | 2.67 | 3.96E-63  | 7.08E-64  |
| Kif23         | 0.2  | 1     | 2.67 | 7.07E-25  | 2.79E-25  |
| Sdsl          | 0.2  | 1.4   | 2.66 | 1.59E-13  | 9.88E-14  |
| Map3k7cl      | 6.4  | 39.6  | 2.65 | 0         | 0         |
| Slfn1         | 0.2  | 1     | 2.63 | 5.40E-15  | 3.12E-15  |
| Tnc           | 1.2  | 7.1   | 2.6  | 2.90E-298 | 1.20E-299 |
| Socs1         | 0.6  | 3.4   | 2.6  | 4.57E-30  | 1.56E-30  |
| Cryba4        | 0.2  | 1.1   | 2.59 | 1.71E-07  | 1.55E-07  |

|               |      |      |      |           |           |
|---------------|------|------|------|-----------|-----------|
| Knstrn        | 0.2  | 1    | 2.57 | 2.53E-18  | 1.26E-18  |
| Slamf9        | 0.4  | 2.4  | 2.56 | 8.53E-20  | 4.01E-20  |
| Nos2          | 0.3  | 1.7  | 2.56 | 1.27E-44  | 3.07E-45  |
| Tceal3        | 1    | 5.8  | 2.54 | 2.01E-43  | 4.98E-44  |
| Fam26f        | 0.2  | 1    | 2.53 | 9.61E-09  | 7.95E-09  |
| Cdkn2a        | 0.2  | 1.1  | 2.52 | 6.87E-08  | 6.02E-08  |
| Fscn1         | 6.9  | 39.1 | 2.51 | 0         | 0         |
| H2-Eb1        | 5.3  | 30   | 2.51 | 0         | 0         |
| Ccl21a        | 1.8  | 10.3 | 2.5  | 4.12E-59  | 7.74E-60  |
| Ptx3          | 1.7  | 9.5  | 2.5  | 1.91E-121 | 1.81E-122 |
| Oasl1         | 0.4  | 2    | 2.49 | 7.93E-30  | 2.73E-30  |
| Cyfip2        | 3.2  | 17.5 | 2.48 | 0         | 0         |
| Nabp1         | 1.8  | 10.5 | 2.47 | 1.86E-171 | 1.27E-172 |
| Gbp2          | 1.2  | 6.7  | 2.47 | 6.44E-109 | 6.89E-110 |
| Ccl8          | 2.3  | 12.6 | 2.46 | 2.40E-41  | 6.24E-42  |
| Gbp3          | 0.7  | 4    | 2.46 | 7.00E-70  | 1.15E-70  |
| Nrep          | 8.3  | 45.1 | 2.45 | 0         | 0         |
| Ccdc69        | 2.3  | 12.7 | 2.45 | 1.85E-117 | 1.80E-118 |
| Tgtp2         | 0.6  | 3.1  | 2.42 | 1.24E-57  | 2.38E-58  |
| Cdc20         | 0.2  | 1.3  | 2.42 | 3.04E-16  | 1.66E-16  |
| Cdca8         | 0.3  | 1.6  | 2.41 | 1.71E-17  | 8.82E-18  |
| Rrad          | 3.7  | 19.1 | 2.4  | 1.87E-191 | 1.12E-192 |
| Spon2         | 0.5  | 2.6  | 2.4  | 1.82E-34  | 5.50E-35  |
| 2810417H13Rik | 0.4  | 2.1  | 2.4  | 5.54E-33  | 1.75E-33  |
| Fcgr1         | 0.4  | 2.2  | 2.39 | 5.63E-37  | 1.62E-37  |
| Rasl10a       | 0.2  | 1.2  | 2.39 | 1.01E-09  | 7.78E-10  |
| Xaf1          | 1    | 4.6  | 2.38 | 2.39E-53  | 4.93E-54  |
| Hamp2         | 0.9  | 4.5  | 2.37 | 7.43E-13  | 4.78E-13  |
| 1810041L15Rik | 0.6  | 3    | 2.37 | 7.77E-112 | 8.00E-113 |
| Mdk           | 4.6  | 23.9 | 2.36 | 1.62E-115 | 1.61E-116 |
| Tgtp1         | 0.4  | 1.8  | 2.36 | 3.52E-32  | 1.13E-32  |
| Fam83d        | 0.3  | 1.3  | 2.36 | 1.31E-16  | 7.01E-17  |
| Isoc2b        | 0.7  | 3.8  | 2.35 | 2.25E-25  | 8.75E-26  |
| Gxylt2        | 0.2  | 1    | 2.35 | 6.90E-14  | 4.21E-14  |
| Rtp4          | 1.5  | 7.7  | 2.34 | 1.62E-76  | 2.41E-77  |
| Glpr2         | 1.1  | 5.3  | 2.34 | 1.26E-67  | 2.12E-68  |
| 1700040L02Rik | 0.2  | 1.2  | 2.34 | 1.55E-10  | 1.14E-10  |
| Serpinh1      | 17.9 | 89.3 | 2.33 | 0         | 0         |
| Gatm          | 2.4  | 12   | 2.33 | 2.41E-174 | 1.60E-175 |
| Aqp4          | 1.2  | 5.9  | 2.33 | 1.41E-183 | 8.86E-185 |
| Ifi47         | 0.6  | 2.9  | 2.33 | 1.57E-32  | 5.00E-33  |
| Bcl6b         | 1.2  | 5.7  | 2.3  | 1.11E-118 | 1.08E-119 |
| Fam198b       | 0.9  | 4.5  | 2.3  | 2.64E-181 | 1.67E-182 |
| Marcks11      | 2.2  | 10.7 | 2.28 | 1.32E-103 | 1.47E-104 |
| Batf3         | 0.2  | 1    | 2.28 | 1.08E-05  | 1.13E-05  |
| H2-DMb1       | 1.3  | 6.1  | 2.27 | 1.33E-47  | 3.05E-48  |
| Rsph1         | 0.7  | 3.6  | 2.26 | 1.73E-25  | 6.72E-26  |
| Zmynd15       | 0.4  | 1.8  | 2.26 | 1.28E-23  | 5.33E-24  |
| Gbp5          | 0.3  | 1.6  | 2.25 | 3.31E-29  | 1.16E-29  |

|           |      |      |      |           |           |
|-----------|------|------|------|-----------|-----------|
| Prim1     | 0.2  | 1.1  | 2.25 | 2.49E-11  | 1.74E-11  |
| Rcn3      | 6.6  | 30.7 | 2.24 | 5.60E-257 | 2.56E-258 |
| Clec11a   | 1    | 4.4  | 2.22 | 5.15E-51  | 1.10E-51  |
| Peg10     | 0.4  | 1.9  | 2.22 | 1.36E-75  | 2.05E-76  |
| Sct       | 0.3  | 1.2  | 2.22 | 7.65E-05  | 8.77E-05  |
| Slfn8     | 0.2  | 1.1  | 2.22 | 4.06E-23  | 1.71E-23  |
| Krt222    | 0.2  | 1.1  | 2.21 | 4.03E-19  | 1.94E-19  |
| Stmn1     | 3.2  | 14.7 | 2.2  | 6.37E-90  | 8.16E-91  |
| Fkbp11    | 0.7  | 3.1  | 2.2  | 4.72E-15  | 2.72E-15  |
| Kif22     | 0.3  | 1.6  | 2.2  | 1.89E-20  | 8.69E-21  |
| Tmem14a   | 0.4  | 1.6  | 2.2  | 1.00E-11  | 6.83E-12  |
| Cdkn2b    | 0.3  | 1.3  | 2.2  | 1.00E-11  | 6.83E-12  |
| Sez6l2    | 0.3  | 1.2  | 2.2  | 6.29E-28  | 2.28E-28  |
| Plagl1    | 4.2  | 18.7 | 2.19 | 0         | 0         |
| Ccnd2     | 0.6  | 2.9  | 2.19 | 1.49E-101 | 1.68E-102 |
| Apol10b   | 0.4  | 1.7  | 2.19 | 2.67E-21  | 1.19E-21  |
| H2-Aa     | 17.3 | 77.3 | 2.18 | 0         | 0         |
| TnfaiP8l1 | 0.3  | 1.5  | 2.18 | 4.60E-21  | 2.07E-21  |
| Rec8      | 1.4  | 6.5  | 2.17 | 1.83E-69  | 3.00E-70  |
| C1qtnf3   | 3.1  | 13.8 | 2.16 | 6.75E-184 | 4.21E-185 |
| Kcnh2     | 0.4  | 1.9  | 2.16 | 8.66E-36  | 2.55E-36  |
| Hdac9     | 0.3  | 1.6  | 2.16 | 2.78E-42  | 7.08E-43  |
| Col8a2    | 0.2  | 1.1  | 2.16 | 1.07E-27  | 3.91E-28  |
| Mmp23     | 1    | 4.1  | 2.15 | 6.48E-34  | 1.99E-34  |
| Arsi      | 0.5  | 1.8  | 2.15 | 2.13E-32  | 6.84E-33  |
| Rtkn2     | 0.2  | 1.3  | 2.15 | 5.72E-21  | 2.58E-21  |
| Cenpa     | 1.1  | 4.3  | 2.14 | 5.20E-31  | 1.74E-31  |
| Lsmem1    | 4.5  | 19.7 | 2.13 | 6.80E-129 | 6.13E-130 |
| Cd4       | 0.3  | 1.2  | 2.13 | 1.04E-22  | 4.46E-23  |
| Cx3cl1    | 1    | 4.1  | 2.12 | 2.73E-71  | 4.38E-72  |
| Fam212b   | 0.9  | 3.9  | 2.12 | 7.47E-98  | 8.73E-99  |
| Mov10     | 0.5  | 2.2  | 2.12 | 7.25E-44  | 1.78E-44  |
| Tap1      | 1.1  | 4.8  | 2.11 | 8.01E-78  | 1.17E-78  |
| Psmb8     | 2.1  | 9.1  | 2.1  | 2.86E-60  | 5.29E-61  |
| Armex6    | 0.6  | 2.5  | 2.1  | 3.90E-29  | 1.37E-29  |
| Mad2l1    | 0.5  | 1.9  | 2.1  | 1.48E-18  | 7.33E-19  |
| Racgap1   | 0.5  | 2.1  | 2.09 | 3.22E-34  | 9.80E-35  |
| Nusap1    | 0.3  | 1    | 2.09 | 1.26E-14  | 7.42E-15  |
| Dupl1     | 13.5 | 56.7 | 2.08 | 0         | 0         |
| Pnck      | 2.6  | 11   | 2.08 | 3.63E-89  | 4.70E-90  |
| Prr29     | 2.7  | 11.3 | 2.07 | 1.56E-45  | 3.70E-46  |
| Tmem255b  | 0.9  | 3.9  | 2.07 | 2.60E-28  | 9.34E-29  |
| Gm4070    | 0.3  | 1.2  | 2.07 | 4.88E-59  | 9.20E-60  |
| Marcks    | 5.2  | 21.6 | 2.06 | 0         | 0         |
| Parp10    | 0.8  | 3.5  | 2.06 | 5.97E-62  | 1.08E-62  |
| Smco4     | 2.7  | 10.9 | 2.05 | 4.77E-59  | 8.98E-60  |
| Pcp4l1    | 1.9  | 8.1  | 2.05 | 2.52E-66  | 4.31E-67  |
| Uba7      | 0.7  | 2.7  | 2.05 | 3.67E-46  | 8.53E-47  |
| Gbp7      | 0.6  | 2.5  | 2.05 | 1.43E-74  | 2.19E-75  |

|               |      |       |      |             |            |
|---------------|------|-------|------|-------------|------------|
| Hddc3         | 3.4  | 23.3  | 2.04 | 7.37E-127   | 6.71E-128  |
| Lxn           | 1.4  | 5.7   | 2.04 | 4.27E-33    | 1.34E-33   |
| Hebp1         | 2.1  | 8.4   | 2.03 | 2.14E-46    | 4.96E-47   |
| H2-Q6         | 0.9  | 3.8   | 2.03 | 1.97E-20    | 9.10E-21   |
| Dok5          | 0.4  | 1.6   | 2.03 | 1.02E-15    | 5.72E-16   |
| Apoa2         | 0.2  | 1     | 2.03 | 0.000356004 | 0.00044134 |
| Crybb1        | 1.4  | 5.6   | 2.02 | 7.64E-26    | 2.93E-26   |
| Nkg7          | 0.4  | 1.7   | 2.02 | 2.12E-08    | 1.80E-08   |
| Ephx4         | 0.3  | 1.2   | 2.02 | 2.12E-08    | 1.80E-08   |
| Rgs16         | 0.5  | 1.9   | 2.01 | 8.86E-24    | 3.65E-24   |
| Il2rg         | 2    | 8     | 2    | 1.26E-66    | 2.15E-67   |
| Dpysl3        | 1.3  | 5.3   | 2    | 5.58E-145   | 4.46E-146  |
| Gm1673        | 0.5  | 1.9   | 2    | 1.60E-06    | 1.56E-06   |
| Cd74          | 44.8 | 173.4 | 1.99 | 0           | 0          |
| Itga9         | 1.1  | 4.4   | 1.99 | 2.01E-120   | 1.93E-121  |
| Exoc3l4       | 0.5  | 2     | 1.99 | 3.80E-33    | 1.19E-33   |
| Cmpk2         | 0.5  | 1.9   | 1.99 | 1.06E-31    | 3.47E-32   |
| Nmrk2         | 34   | 156.8 | 1.98 | 0           | 0          |
| Ndn           | 1.7  | 6.6   | 1.98 | 3.13E-55    | 6.24E-56   |
| Ifi203        | 2.1  | 8.1   | 1.96 | 7.47E-160   | 5.41E-161  |
| Stat1         | 1.7  | 6.9   | 1.96 | 8.54E-144   | 6.91E-145  |
| Emilin1       | 1.3  | 5     | 1.96 | 3.48E-86    | 4.65E-87   |
| Pik3ap1       | 0.4  | 1.5   | 1.96 | 4.08E-31    | 1.36E-31   |
| Preli2        | 0.5  | 1.8   | 1.95 | 8.62E-08    | 7.60E-08   |
| Cd52          | 7.2  | 27.4  | 1.94 | 2.63E-68    | 4.40E-69   |
| Nfkbie        | 0.3  | 1.2   | 1.94 | 3.85E-16    | 2.11E-16   |
| Cstad         | 0.3  | 1.2   | 1.94 | 4.04E-06    | 4.10E-06   |
| Tmem202       | 0.3  | 1.1   | 1.94 | 1.54E-06    | 1.51E-06   |
| Trim21        | 0.3  | 1.1   | 1.94 | 1.81E-16    | 9.76E-17   |
| Bex1          | 23.1 | 86.3  | 1.93 | 0           | 0          |
| Chid1         | 1.2  | 5.3   | 1.93 | 1.00E-59    | 1.86E-60   |
| Cd83          | 0.7  | 2.6   | 1.93 | 1.84E-28    | 6.61E-29   |
| Tlr1          | 0.3  | 1.1   | 1.93 | 1.32E-16    | 7.08E-17   |
| Armxc2        | 1.2  | 4.4   | 1.92 | 3.02E-74    | 4.65E-75   |
| Crym          | 0.7  | 2.7   | 1.92 | 1.27E-17    | 6.51E-18   |
| Gamt          | 28   | 104.5 | 1.91 | 0           | 0          |
| Igtp          | 2.5  | 9.4   | 1.91 | 1.34E-92    | 1.68E-93   |
| Ptgr1         | 1.4  | 5.2   | 1.91 | 2.37E-34    | 7.20E-35   |
| Fgd2          | 0.6  | 2.2   | 1.91 | 1.89E-22    | 8.13E-23   |
| Epsti1        | 0.6  | 2.2   | 1.91 | 3.72E-20    | 1.73E-20   |
| Myl3          | 11.3 | 42.3  | 1.9  | 8.37E-174   | 5.58E-175  |
| Dpt           | 7    | 25.7  | 1.9  | 3.75E-199   | 2.16E-200  |
| Gimap4        | 2.3  | 9.1   | 1.9  | 1.96E-66    | 3.35E-67   |
| Rcn1          | 1.7  | 6.4   | 1.9  | 1.06E-94    | 1.30E-95   |
| Zfp365        | 1.1  | 4.1   | 1.9  | 5.60E-86    | 7.51E-87   |
| 2610042L04Rik | 0.5  | 1.4   | 1.9  | 3.28E-12    | 2.18E-12   |
| Mfap4         | 12.4 | 45.3  | 1.89 | 0           | 0          |
| Col14a1       | 1.6  | 6     | 1.89 | 8.89E-184   | 5.57E-185  |
| Dok4          | 1    | 3.6   | 1.88 | 6.45E-45    | 1.55E-45   |

|               |      |      |      |           |           |
|---------------|------|------|------|-----------|-----------|
| Rpl34-ps1     | 25.8 | 93.6 | 1.87 | 1.48E-201 | 8.46E-203 |
| Krt18         | 16.6 | 59.8 | 1.87 | 0         | 0         |
| Ripk3         | 0.4  | 1.6  | 1.87 | 3.49E-15  | 2.00E-15  |
| Cdkn1c        | 24.4 | 87.5 | 1.86 | 0         | 0         |
| Tgfb1i1       | 4.7  | 17.8 | 1.86 | 5.41E-147 | 4.25E-148 |
| Pcbd1         | 2.8  | 10.1 | 1.86 | 1.58E-38  | 4.38E-39  |
| C1qtnf2       | 1.1  | 3.8  | 1.86 | 3.91E-22  | 1.70E-22  |
| Fam171b       | 0.6  | 2.1  | 1.86 | 2.99E-57  | 5.78E-58  |
| Fam57a        | 0.6  | 2    | 1.86 | 2.65E-17  | 1.38E-17  |
| Sox11         | 0.4  | 1.2  | 1.86 | 2.65E-50  | 5.77E-51  |
| Cited4        | 21.1 | 75.8 | 1.85 | 0         | 0         |
| Cnn2          | 3.4  | 12   | 1.85 | 1.22E-99  | 1.41E-100 |
| Kdr           | 1.8  | 6.3  | 1.85 | 3.41E-159 | 2.49E-160 |
| S1pr3         | 0.6  | 2    | 1.85 | 3.59E-42  | 9.17E-43  |
| Tnni3         | 0.3  | 1.1  | 1.85 | 6.04E-06  | 6.21E-06  |
| Pcdh18        | 0.3  | 1.1  | 1.85 | 5.07E-27  | 1.89E-27  |
| Gmppb         | 1.3  | 4.6  | 1.84 | 6.45E-38  | 1.80E-38  |
| Serpinb9      | 0.8  | 2.8  | 1.84 | 3.39E-38  | 9.44E-39  |
| Hba-a2        | 18.4 | 66   | 1.83 | 2.70E-164 | 1.90E-165 |
| Fam71e1       | 2.5  | 7.9  | 1.83 | 2.85E-121 | 2.70E-122 |
| Clec12a       | 0.9  | 3.2  | 1.83 | 9.31E-21  | 4.24E-21  |
| Dhx58         | 0.6  | 1.9  | 1.83 | 1.24E-22  | 5.31E-23  |
| Armex1        | 0.5  | 1.9  | 1.83 | 1.55E-20  | 7.13E-21  |
| Themis2       | 0.4  | 1.6  | 1.83 | 1.73E-27  | 6.33E-28  |
| Lrrc15        | 0.4  | 1.5  | 1.83 | 9.16E-37  | 2.64E-37  |
| Kctd12b       | 0.5  | 1.6  | 1.82 | 1.36E-36  | 3.96E-37  |
| 1700007K13Rik | 0.4  | 1.3  | 1.82 | 2.16E-06  | 2.13E-06  |
| Ush1c         | 0.3  | 1.2  | 1.82 | 3.21E-14  | 1.93E-14  |
| Myog          | 15.8 | 54.5 | 1.81 | 0         | 0         |
| Fam101b       | 4.4  | 15.2 | 1.81 | 1.52E-238 | 7.39E-240 |
| Lrp2bp        | 1.5  | 5.3  | 1.81 | 7.00E-77  | 1.03E-77  |
| Cks2          | 1    | 3.5  | 1.81 | 1.02E-11  | 6.99E-12  |
| Fam19a3       | 0.7  | 2.5  | 1.81 | 1.60E-50  | 3.46E-51  |
| Unc5b         | 0.5  | 1.6  | 1.81 | 9.83E-43  | 2.48E-43  |
| Wisp1         | 0.3  | 1.1  | 1.81 | 5.92E-27  | 2.21E-27  |
| Iqsec3        | 0.3  | 1    | 1.81 | 6.13E-32  | 1.99E-32  |
| Mndal         | 3    | 11.2 | 1.8  | 1.00E-101 | 1.13E-102 |
| Slc16a6       | 1    | 3.6  | 1.8  | 5.37E-66  | 9.21E-67  |
| Tspan18       | 0.5  | 1.6  | 1.8  | 9.46E-28  | 3.45E-28  |
| Bok           | 1.2  | 4.2  | 1.79 | 8.21E-30  | 2.83E-30  |
| Cyp4f39       | 1.1  | 3.7  | 1.79 | 7.03E-42  | 1.81E-42  |
| Tnfrsf19      | 1    | 3.3  | 1.79 | 8.87E-60  | 1.65E-60  |
| Pyhin1        | 0.3  | 1    | 1.79 | 8.02E-17  | 4.25E-17  |
| Lgals9        | 4.7  | 15.9 | 1.78 | 2.34E-103 | 2.61E-104 |
| Ms4a7         | 3.3  | 11.2 | 1.78 | 3.38E-65  | 5.85E-66  |
| Icam2         | 2.8  | 9.6  | 1.78 | 8.83E-49  | 1.97E-49  |
| Ptprs         | 2.6  | 8.9  | 1.78 | 5.35E-200 | 3.07E-201 |
| Dut           | 1    | 3.3  | 1.78 | 2.73E-34  | 8.29E-35  |
| Lhfp12        | 0.9  | 2.9  | 1.78 | 4.79E-57  | 9.29E-58  |

|               |       |       |      |           |           |
|---------------|-------|-------|------|-----------|-----------|
| Igfbp2        | 0.8   | 2.8   | 1.78 | 5.94E-15  | 3.44E-15  |
| Fcgr4         | 0.7   | 2.5   | 1.78 | 9.91E-15  | 5.82E-15  |
| Parp14        | 0.7   | 2.4   | 1.78 | 2.37E-77  | 3.49E-78  |
| Slc15a3       | 0.7   | 2.2   | 1.78 | 6.11E-24  | 2.51E-24  |
| Colla1        | 113.4 | 382.9 | 1.77 | 0         | 0         |
| Cd247         | 0.8   | 2.2   | 1.77 | 1.89E-18  | 9.35E-19  |
| 2310033P09Rik | 1.9   | 6.4   | 1.76 | 1.28E-34  | 3.86E-35  |
| Kif11         | 0.4   | 1.3   | 1.76 | 4.00E-29  | 1.41E-29  |
| Acta2         | 15.5  | 51.1  | 1.75 | 0         | 0         |
| 1500015O10Rik | 0.5   | 1.8   | 1.75 | 5.79E-08  | 5.05E-08  |
| Rnf213        | 0.5   | 1.7   | 1.75 | 3.16E-121 | 3.00E-122 |
| Tuba1a        | 19.1  | 62.8  | 1.74 | 0         | 0         |
| Gm13889       | 11.1  | 36.5  | 1.74 | 2.31E-197 | 1.36E-198 |
| Ets1          | 1.8   | 6.2   | 1.74 | 1.15E-126 | 1.04E-127 |
| Lurap11       | 0.9   | 3.1   | 1.74 | 5.16E-23  | 2.18E-23  |
| Ska2          | 0.5   | 1.8   | 1.74 | 1.25E-11  | 8.61E-12  |
| P4ha3         | 0.5   | 1.6   | 1.74 | 5.27E-17  | 2.77E-17  |
| Mcm5          | 0.4   | 1.4   | 1.74 | 3.47E-21  | 1.56E-21  |
| Col24a1       | 0.4   | 1.3   | 1.74 | 3.40E-41  | 8.90E-42  |
| Jchain        | 0.3   | 1     | 1.74 | 3.69E-10  | 2.77E-10  |
| Crtap         | 4.5   | 14.9  | 1.73 | 5.47E-107 | 5.94E-108 |
| Plxnd1        | 3.7   | 12.3  | 1.73 | 0         | 0         |
| Basp1         | 1.6   | 5.3   | 1.73 | 5.53E-42  | 1.42E-42  |
| Vmn1r65       | 0.9   | 2.9   | 1.73 | 8.11E-33  | 2.57E-33  |
| Itgb3bp       | 0.6   | 2     | 1.73 | 2.28E-16  | 1.23E-16  |
| Pycard        | 0.5   | 1.7   | 1.73 | 2.28E-16  | 1.23E-16  |
| Ssu2          | 0.4   | 1.5   | 1.73 | 2.33E-10  | 1.73E-10  |
| Ckb           | 3.9   | 12.7  | 1.72 | 1.48E-77  | 2.17E-78  |
| Gm4841        | 3.7   | 12.2  | 1.72 | 1.31E-140 | 1.09E-141 |
| Cxx1c         | 2.6   | 8.5   | 1.72 | 3.53E-34  | 1.08E-34  |
| Gpr162        | 0.4   | 1.3   | 1.72 | 2.89E-17  | 1.50E-17  |
| Adam12        | 0.4   | 1.3   | 1.72 | 1.34E-43  | 3.31E-44  |
| Tm4sf1        | 3.5   | 11.3  | 1.71 | 1.26E-72  | 1.99E-73  |
| Eps811        | 0.5   | 1.6   | 1.71 | 4.97E-30  | 1.70E-30  |
| Serp1nb6b     | 0.3   | 1     | 1.71 | 1.00E-08  | 8.30E-09  |
| Gsta4         | 4     | 13.2  | 1.7  | 2.40E-51  | 5.07E-52  |
| Kdelr3        | 2.3   | 7.5   | 1.7  | 5.52E-44  | 1.35E-44  |
| Ctso          | 0.6   | 2     | 1.7  | 1.70E-29  | 5.89E-30  |
| Ptx4          | 0.4   | 1.4   | 1.7  | 2.85E-08  | 2.44E-08  |
| Sybu          | 0.3   | 1     | 1.7  | 1.59E-11  | 1.10E-11  |
| Hba-a1        | 35.6  | 115   | 1.69 | 1.01E-246 | 4.70E-248 |
| Col6a3        | 5.3   | 16.8  | 1.69 | 0         | 0         |
| Lcp1          | 2.4   | 7.8   | 1.69 | 1.71E-111 | 1.77E-112 |
| Dynl11        | 12.8  | 40.7  | 1.68 | 0         | 0         |
| Lgals3bp      | 7.9   | 25.1  | 1.68 | 3.68E-217 | 1.91E-218 |
| Mgl2          | 2     | 6.5   | 1.68 | 2.78E-39  | 7.56E-40  |
| Angpt1        | 0.8   | 2.5   | 1.68 | 8.82E-39  | 2.43E-39  |
| Exo5          | 0.4   | 1.2   | 1.68 | 1.04E-10  | 7.54E-11  |
| Spats2l       | 1     | 2.7   | 1.67 | 9.87E-39  | 2.72E-39  |

|              |      |      |      |             |             |
|--------------|------|------|------|-------------|-------------|
| Rwdd3        | 0.6  | 2    | 1.67 | 6.39E-13    | 4.09E-13    |
| Zfp296       | 0.4  | 1.2  | 1.67 | 1.53E-08    | 1.29E-08    |
| Dbp          | 18.9 | 60.6 | 1.66 | 0           | 0           |
| Ift122       | 3.2  | 9.9  | 1.66 | 2.44E-160   | 1.76E-161   |
| Mkl1         | 0.5  | 1.6  | 1.66 | 2.04E-13    | 1.27E-13    |
| Ngfrap1      | 2.7  | 8.5  | 1.65 | 1.70E-31    | 5.59E-32    |
| Col18a1      | 2.3  | 7.1  | 1.65 | 1.07E-142   | 8.80E-144   |
| Nudt1        | 1.8  | 5.5  | 1.64 | 5.35E-21    | 2.41E-21    |
| Rmi2         | 0.6  | 1.7  | 1.64 | 5.55E-26    | 2.12E-26    |
| Lcp2         | 0.4  | 1.1  | 1.64 | 3.99E-16    | 2.19E-16    |
| Lama4        | 1.5  | 4.7  | 1.63 | 5.86E-112   | 6.02E-113   |
| Efs          | 0.6  | 1.8  | 1.63 | 9.65E-26    | 3.72E-26    |
| Exoc3l2      | 0.3  | 1    | 1.63 | 2.67E-17    | 1.38E-17    |
| Pcbd2        | 5.2  | 15.8 | 1.62 | 2.31E-35    | 6.86E-36    |
| Ebpl         | 1.2  | 3.7  | 1.62 | 1.72E-30    | 5.84E-31    |
| Prkar2b      | 0.4  | 1    | 1.62 | 8.74E-14    | 5.36E-14    |
| Cd1d1        | 0.3  | 1    | 1.62 | 1.87E-08    | 1.58E-08    |
| Myct1        | 1.9  | 5.9  | 1.61 | 2.12E-63    | 3.77E-64    |
| Opn3         | 0.8  | 2.3  | 1.61 | 1.64E-14    | 9.70E-15    |
| Vstm4        | 0.7  | 2.1  | 1.61 | 2.53E-22    | 1.10E-22    |
| Hmgn2        | 30.6 | 92.2 | 1.6  | 0           | 0           |
| Ckap4        | 6.3  | 18.7 | 1.6  | 1.87E-204   | 1.05E-205   |
| Ccl5         | 2.9  | 8.8  | 1.6  | 1.76E-19    | 8.38E-20    |
| Gm13139      | 0.5  | 1.6  | 1.6  | 6.37E-18    | 3.23E-18    |
| LOC105247253 | 0.5  | 1.6  | 1.6  | 0.000420774 | 0.000526749 |
| Rnf208       | 0.6  | 1.6  | 1.6  | 1.23E-09    | 9.56E-10    |
| Vkorc1       | 8    | 24   | 1.59 | 6.80E-67    | 1.15E-67    |
| Echdc3       | 1.3  | 4    | 1.59 | 6.00E-28    | 2.18E-28    |
| Nrros        | 1.1  | 3.5  | 1.59 | 7.30E-33    | 2.31E-33    |
| Zfp612       | 1.1  | 3.2  | 1.59 | 1.65E-58    | 3.13E-59    |
| Cryl1        | 0.9  | 2.6  | 1.59 | 1.11E-14    | 6.52E-15    |
| Alyref2      | 0.8  | 2.5  | 1.59 | 5.00E-13    | 3.19E-13    |
| Fam111a      | 0.7  | 2.1  | 1.59 | 4.36E-26    | 1.66E-26    |
| Tspan2       | 0.7  | 2.1  | 1.59 | 4.27E-33    | 1.34E-33    |
| Tnfsf10      | 0.6  | 1.8  | 1.59 | 1.72E-34    | 5.21E-35    |
| Mmp15        | 3.7  | 11   | 1.58 | 5.52E-175   | 3.63E-176   |
| Tubb2b       | 2.4  | 7    | 1.58 | 2.33E-50    | 5.07E-51    |
| Sepn1        | 1.6  | 4.7  | 1.58 | 2.61E-61    | 4.76E-62    |
| Faim         | 1    | 3    | 1.58 | 1.88E-12    | 1.23E-12    |
| Arhgap4      | 0.5  | 1.6  | 1.58 | 1.61E-16    | 8.64E-17    |
| D1Ert622e    | 1.4  | 4.2  | 1.57 | 1.51E-41    | 3.91E-42    |
| Tnfaip3      | 1    | 3    | 1.57 | 1.36E-48    | 3.03E-49    |
| Hck          | 0.4  | 1.3  | 1.57 | 1.50E-11    | 1.04E-11    |
| Igfbp5       | 30.2 | 89   | 1.56 | 0           | 0           |
| Col6a2       | 21.6 | 62.9 | 1.56 | 0           | 0           |
| Pea15a       | 7.1  | 20.9 | 1.56 | 4.12E-187   | 2.51E-188   |
| Gbp6         | 1.5  | 4.3  | 1.56 | 8.99E-67    | 1.53E-67    |
| Bace2        | 0.3  | 1    | 1.56 | 6.48E-14    | 3.95E-14    |
| Gdf1         | 5.6  | 17.1 | 1.55 | 2.87E-117   | 2.80E-118   |



|          |       |        |      |           |           |
|----------|-------|--------|------|-----------|-----------|
| Asb10    | 5.6   | 16.5   | 1.55 | 3.12E-134 | 2.70E-135 |
| Col16a1  | 3.2   | 9.7    | 1.55 | 9.28E-130 | 8.32E-131 |
| Pxdn     | 2.7   | 8      | 1.55 | 1.07E-151 | 8.14E-153 |
| Tmtc1    | 2.2   | 6.5    | 1.55 | 4.66E-193 | 2.78E-194 |
| H2-Q7    | 1.9   | 5.7    | 1.55 | 3.37E-25  | 1.32E-25  |
| Jade1    | 1.2   | 3.6    | 1.55 | 1.61E-71  | 2.57E-72  |
| Fhl2     | 1.2   | 3.4    | 1.55 | 2.59E-18  | 1.29E-18  |
| Slc7a5   | 0.9   | 2.5    | 1.55 | 4.81E-33  | 1.51E-33  |
| Cited1   | 0.8   | 2.4    | 1.55 | 3.31E-08  | 2.84E-08  |
| Lag3     | 0.5   | 1.5    | 1.55 | 5.18E-12  | 3.48E-12  |
| Lair1    | 0.4   | 1.1    | 1.55 | 2.02E-14  | 1.20E-14  |
| Snx20    | 0.4   | 1.1    | 1.55 | 9.45E-08  | 8.36E-08  |
| Rasgef1b | 0.4   | 1      | 1.55 | 1.30E-12  | 8.47E-13  |
| Ly6e     | 36.1  | 104.1  | 1.54 | 0         | 0         |
| Ptges3l  | 27.3  | 79.9   | 1.54 | 6.24E-247 | 2.89E-248 |
| Lmnb1    | 1.3   | 3.8    | 1.54 | 9.42E-40  | 2.53E-40  |
| Nid2     | 0.9   | 2.6    | 1.54 | 6.66E-47  | 1.53E-47  |
| Trmt12   | 0.7   | 2.1    | 1.54 | 1.43E-31  | 4.69E-32  |
| B3galt6  | 0.4   | 1.2    | 1.54 | 1.52E-15  | 8.57E-16  |
| Pfn4     | 0.4   | 1.1    | 1.54 | 2.25E-06  | 2.23E-06  |
| Tmsb4x   | 179.5 | 519.1  | 1.53 | 0         | 0         |
| Tnmd     | 3.9   | 11.2   | 1.53 | 1.29E-52  | 2.68E-53  |
| Paqr7    | 2.6   | 8.5    | 1.53 | 3.11E-73  | 4.85E-74  |
| Oaf      | 2.6   | 7.5    | 1.53 | 1.39E-63  | 2.46E-64  |
| Tpst1    | 1.9   | 5.5    | 1.53 | 1.95E-37  | 5.54E-38  |
| Gsdmd    | 1.8   | 5.1    | 1.53 | 5.67E-33  | 1.79E-33  |
| Calml4   | 1.6   | 4.5    | 1.53 | 1.11E-13  | 6.86E-14  |
| Sp110    | 1.2   | 3.3    | 1.53 | 1.31E-23  | 5.42E-24  |
| Sox7     | 1.1   | 3.2    | 1.53 | 1.01E-37  | 2.83E-38  |
| Esr1     | 0.9   | 2.6    | 1.53 | 1.01E-55  | 1.99E-56  |
| Rtp3     | 0.5   | 1.5    | 1.53 | 2.65E-14  | 1.59E-14  |
| Chst7    | 0.4   | 1      | 1.53 | 1.90E-09  | 1.50E-09  |
| Fabp5    | 9.1   | 25.8   | 1.52 | 9.73E-86  | 1.31E-86  |
| Gpx8     | 6     | 16.1   | 1.52 | 1.77E-54  | 3.58E-55  |
| Capn6    | 3.2   | 9.1    | 1.52 | 3.03E-115 | 3.02E-116 |
| Adar     | 0.7   | 2.1    | 1.52 | 6.70E-43  | 1.68E-43  |
| Aurka    | 0.7   | 1.9    | 1.52 | 1.29E-13  | 8.00E-14  |
| Car3     | 394.8 | 1132.5 | 1.51 | 0         | 0         |
| My12     | 6.5   | 18.3   | 1.51 | 5.12E-40  | 1.36E-40  |
| Thy1     | 5.4   | 15.1   | 1.51 | 1.67E-91  | 2.12E-92  |
| Ogn      | 5.3   | 14.8   | 1.51 | 2.80E-129 | 2.51E-130 |
| Ube2l6   | 3.8   | 10.6   | 1.51 | 1.80E-51  | 3.80E-52  |
| Hic1     | 1.8   | 5      | 1.51 | 5.04E-54  | 1.03E-54  |
| Asb18    | 0.8   | 2.2    | 1.51 | 2.93E-15  | 1.68E-15  |
| Foxs1    | 0.7   | 1.9    | 1.51 | 5.19E-10  | 3.94E-10  |
| Traf1    | 0.5   | 1.5    | 1.51 | 2.46E-14  | 1.47E-14  |
| Pydc4    | 0.6   | 1.3    | 1.51 | 4.52E-10  | 3.41E-10  |
| Zfp433   | 0.4   | 1.2    | 1.51 | 9.60E-12  | 6.56E-12  |
| Ampd1    | 114.4 | 342.6  | 1.5  | 0         | 0         |

|          |       |       |      |           |           |
|----------|-------|-------|------|-----------|-----------|
| Eml1     | 4.8   | 13.6  | 1.5  | 7.05E-177 | 4.56E-178 |
| Cpq      | 2.3   | 6.6   | 1.5  | 9.52E-44  | 2.34E-44  |
| Nmi      | 1.3   | 3.7   | 1.5  | 6.55E-18  | 3.32E-18  |
| Klhl23   | 1.1   | 3.2   | 1.5  | 1.42E-45  | 3.35E-46  |
| Tcf19    | 1     | 2.9   | 1.5  | 3.13E-17  | 1.63E-17  |
| Golga7b  | 0.8   | 2.4   | 1.5  | 3.68E-24  | 1.50E-24  |
| B3gnt9   | 0.5   | 1.5   | 1.5  | 1.85E-13  | 1.15E-13  |
| Rem1     | 0.5   | 1.3   | 1.5  | 1.98E-08  | 1.68E-08  |
| Mppe1    | 1.7   | 4.9   | 1.49 | 8.17E-34  | 2.52E-34  |
| Kera     | 1.7   | 4.7   | 1.49 | 2.76E-31  | 9.14E-32  |
| Il15     | 1.3   | 3.3   | 1.49 | 2.18E-16  | 1.18E-16  |
| Ephb3    | 0.6   | 1.7   | 1.49 | 6.85E-25  | 2.70E-25  |
| Ebi3     | 0.4   | 1.3   | 1.49 | 1.37E-05  | 1.46E-05  |
| Myadm    | 16.5  | 45.7  | 1.48 | 0         | 0         |
| Cmss1    | 5.1   | 14.5  | 1.48 | 9.70E-53  | 2.01E-53  |
| Fam114a1 | 2     | 5.5   | 1.48 | 4.37E-55  | 8.75E-56  |
| Fxyd7    | 1.3   | 3.7   | 1.48 | 1.66E-09  | 1.30E-09  |
| Alox12   | 0.5   | 1.6   | 1.48 | 1.34E-13  | 8.27E-14  |
| Cd300ld  | 0.4   | 1.1   | 1.48 | 2.74E-10  | 2.04E-10  |
| Igsf10   | 0.4   | 1     | 1.48 | 1.94E-29  | 6.76E-30  |
| Tmsb10   | 203.3 | 559.5 | 1.47 | 0         | 0         |
| Colla2   | 78.3  | 213.2 | 1.47 | 0         | 0         |
| Prkag3   | 34.6  | 95    | 1.47 | 0         | 0         |
| Rhbd11   | 9.3   | 26.9  | 1.47 | 1.01E-138 | 8.47E-140 |
| Tspan9   | 5.3   | 14.7  | 1.47 | 1.87E-189 | 1.13E-190 |
| Nagk     | 2.2   | 6.1   | 1.47 | 5.52E-26  | 2.10E-26  |
| Cetn4    | 0.4   | 1.2   | 1.47 | 2.02E-05  | 2.19E-05  |
| Pmaip1   | 0.4   | 1     | 1.47 | 2.69E-10  | 2.00E-10  |
| Tubb6    | 15.2  | 41.2  | 1.46 | 1.26E-243 | 5.98E-245 |
| Plcd4    | 4.7   | 13    | 1.46 | 6.25E-116 | 6.15E-117 |
| C1qtnf6  | 4.5   | 12.4  | 1.46 | 1.20E-93  | 1.48E-94  |
| Hbb-bt   | 1.5   | 4     | 1.46 | 1.67E-09  | 1.31E-09  |
| Trim30a  | 0.7   | 2     | 1.46 | 2.14E-26  | 8.10E-27  |
| Tpx2     | 0.7   | 1.9   | 1.46 | 1.43E-23  | 5.92E-24  |
| Lrrc48   | 0.6   | 1.7   | 1.46 | 2.83E-12  | 1.87E-12  |
| Tubb2a   | 6.6   | 17.9  | 1.45 | 1.28E-95  | 1.54E-96  |
| Kctd17   | 6.3   | 17.5  | 1.45 | 2.38E-97  | 2.79E-98  |
| Ddah2    | 4.5   | 12.2  | 1.45 | 8.12E-54  | 1.65E-54  |
| Mdga1    | 3.6   | 8.5   | 1.45 | 1.15E-198 | 6.69E-200 |
| Tgfb2    | 2     | 5.3   | 1.45 | 3.93E-86  | 5.26E-87  |
| Gm13871  | 0.5   | 1.5   | 1.45 | 2.00E-07  | 1.81E-07  |
| Zap70    | 0.5   | 1.2   | 1.45 | 1.85E-09  | 1.46E-09  |
| Col5a1   | 7.2   | 19.4  | 1.44 | 0         | 0         |
| Sp100    | 4     | 10.8  | 1.44 | 8.31E-96  | 1.00E-96  |
| Efemp2   | 3.5   | 9.5   | 1.44 | 2.11E-48  | 4.71E-49  |
| Coa4     | 3.3   | 8.7   | 1.44 | 3.10E-25  | 1.21E-25  |
| Tceal1   | 2.3   | 6.2   | 1.44 | 2.21E-24  | 8.93E-25  |
| Adam19   | 1.7   | 4.7   | 1.44 | 2.58E-81  | 3.60E-82  |
| Plekha2  | 1.6   | 4.3   | 1.44 | 9.72E-72  | 1.55E-72  |

|          |       |       |      |           |           |
|----------|-------|-------|------|-----------|-----------|
| Fam212a  | 1.1   | 3.1   | 1.44 | 8.77E-12  | 5.97E-12  |
| Tex38    | 1.1   | 3     | 1.44 | 4.97E-10  | 3.77E-10  |
| Chek2    | 1.1   | 2.9   | 1.44 | 7.99E-18  | 4.07E-18  |
| Gbp4     | 0.9   | 2.5   | 1.44 | 6.78E-37  | 1.96E-37  |
| Cd59b    | 0.6   | 2.2   | 1.44 | 1.41E-10  | 1.03E-10  |
| Wnt5b    | 0.6   | 1.5   | 1.44 | 5.23E-12  | 3.52E-12  |
| Cd274    | 0.5   | 1.2   | 1.44 | 8.04E-16  | 4.47E-16  |
| Tuba1b   | 26.6  | 70.7  | 1.43 | 0         | 0         |
| Igf1     | 1.8   | 4.8   | 1.43 | 4.47E-109 | 4.77E-110 |
| H2-DMa   | 1.4   | 4.4   | 1.43 | 8.31E-28  | 3.03E-28  |
| Stat2    | 1.3   | 3.6   | 1.43 | 1.04E-49  | 2.29E-50  |
| Hn1l     | 1     | 2.8   | 1.43 | 4.07E-24  | 1.66E-24  |
| Ptpn6    | 0.9   | 2.4   | 1.43 | 1.44E-18  | 7.09E-19  |
| Adipoq   | 0.8   | 2.1   | 1.43 | 2.35E-09  | 1.86E-09  |
| Lix1     | 0.7   | 1.8   | 1.43 | 1.99E-18  | 9.88E-19  |
| Tril     | 0.6   | 1.7   | 1.43 | 2.46E-30  | 8.38E-31  |
| Hacd4    | 0.7   | 1.6   | 1.43 | 1.63E-16  | 8.77E-17  |
| Hspa12a  | 0.5   | 1.3   | 1.43 | 5.71E-25  | 2.25E-25  |
| Cxcl16   | 3.1   | 8.1   | 1.42 | 4.39E-62  | 7.92E-63  |
| Chchd6   | 1.2   | 3.3   | 1.42 | 2.04E-12  | 1.34E-12  |
| Ldoc1l   | 0.7   | 2     | 1.42 | 4.11E-29  | 1.45E-29  |
| Hps1     | 0.7   | 1.8   | 1.42 | 3.17E-17  | 1.66E-17  |
| Sfrp2    | 0.6   | 1.7   | 1.42 | 9.60E-12  | 6.56E-12  |
| P2ry1    | 0.6   | 1.6   | 1.42 | 6.76E-20  | 3.17E-20  |
| Wdr5b    | 0.6   | 1.5   | 1.42 | 3.76E-10  | 2.82E-10  |
| Scube2   | 0.4   | 1     | 1.42 | 3.43E-12  | 2.28E-12  |
| Islr     | 7.1   | 18.5  | 1.41 | 3.29E-121 | 3.13E-122 |
| Grb14    | 6.1   | 16.5  | 1.41 | 1.38E-97  | 1.62E-98  |
| Mthfsd   | 2.7   | 6.5   | 1.41 | 2.59E-35  | 7.70E-36  |
| Dhcr7    | 2.2   | 5.7   | 1.41 | 5.23E-44  | 1.28E-44  |
| Inpp5j   | 0.9   | 2.4   | 1.41 | 1.92E-27  | 7.04E-28  |
| Mfsd7a   | 0.9   | 2.4   | 1.41 | 1.64E-19  | 7.81E-20  |
| Pafah1b3 | 0.8   | 2.2   | 1.41 | 1.96E-07  | 1.78E-07  |
| Nrp      | 0.4   | 1.1   | 1.41 | 2.37E-05  | 2.58E-05  |
| Hoxb7    | 0.4   | 1.1   | 1.41 | 6.80E-06  | 7.03E-06  |
| Cxcl12   | 8.5   | 23.5  | 1.4  | 1.93E-198 | 1.13E-199 |
| Irf5     | 2.9   | 7.6   | 1.4  | 3.43E-49  | 7.58E-50  |
| Limd2    | 2.8   | 7.4   | 1.4  | 1.53E-37  | 4.31E-38  |
| Trim12c  | 0.9   | 2.4   | 1.4  | 2.82E-27  | 1.04E-27  |
| Slc26a10 | 0.7   | 1.8   | 1.4  | 9.53E-14  | 5.85E-14  |
| Gale     | 0.6   | 1.6   | 1.4  | 4.96E-09  | 4.01E-09  |
| Neu2     | 7.7   | 20.2  | 1.39 | 1.65E-96  | 1.97E-97  |
| Mthfd2   | 1.9   | 5     | 1.39 | 1.01E-32  | 3.20E-33  |
| Cfap126  | 1.4   | 3.8   | 1.39 | 2.41E-12  | 1.59E-12  |
| Tmem116  | 1.1   | 3     | 1.39 | 1.44E-12  | 9.40E-13  |
| Snai2    | 0.9   | 2.4   | 1.39 | 1.89E-16  | 1.02E-16  |
| Lpcat2   | 0.8   | 1.8   | 1.39 | 4.45E-13  | 2.83E-13  |
| Actb     | 150.8 | 390.1 | 1.38 | 0         | 0         |
| Cav1     | 38.9  | 102.9 | 1.38 | 0         | 0         |

|               |      |       |      |             |             |
|---------------|------|-------|------|-------------|-------------|
| Tspan13       | 19.4 | 50.1  | 1.38 | 5.07E-286   | 2.19E-287   |
| Gngl1         | 14.8 | 38.3  | 1.38 | 3.34E-95    | 4.06E-96    |
| Smco1         | 14.6 | 38.2  | 1.38 | 5.59E-141   | 4.62E-142   |
| Pde4a         | 8.7  | 23    | 1.38 | 3.57E-285   | 1.55E-286   |
| Mrc2          | 2    | 5.1   | 1.38 | 4.34E-92    | 5.46E-93    |
| Prc1          | 1.2  | 3     | 1.38 | 5.24E-27    | 1.95E-27    |
| Sertad4       | 0.9  | 2.4   | 1.38 | 8.60E-25    | 3.41E-25    |
| Gm40368       | 0.9  | 2.2   | 1.38 | 1.76E-14    | 1.05E-14    |
| Hist1h3d      | 0.8  | 2.1   | 1.38 | 0.000217374 | 0.000262709 |
| Spc25         | 0.7  | 1.8   | 1.38 | 6.20E-09    | 5.04E-09    |
| Lbx2          | 0.7  | 1.7   | 1.38 | 1.66E-05    | 1.78E-05    |
| Tpm4          | 12.7 | 32.7  | 1.37 | 1.61E-202   | 9.08E-204   |
| Mt3           | 11.4 | 29.7  | 1.37 | 1.36E-45    | 3.22E-46    |
| Akr1e1        | 4.6  | 11.8  | 1.37 | 1.20E-60    | 2.21E-61    |
| Ube2c         | 3.6  | 9.2   | 1.37 | 3.67E-26    | 1.40E-26    |
| Pdia4         | 2.5  | 6.6   | 1.37 | 4.79E-51    | 1.02E-51    |
| Mgmt          | 2    | 5.3   | 1.37 | 2.37E-14    | 1.41E-14    |
| Dclk1         | 1.5  | 3.8   | 1.37 | 1.09E-64    | 1.91E-65    |
| E130311K13Rik | 1    | 2.6   | 1.37 | 9.37E-14    | 5.75E-14    |
| Lig1          | 0.6  | 1.5   | 1.37 | 5.59E-16    | 3.09E-16    |
| Tmem45a       | 0.5  | 1.4   | 1.37 | 2.89E-08    | 2.47E-08    |
| Parp9         | 2.4  | 6.1   | 1.36 | 1.30E-57    | 2.49E-58    |
| Dpysl2        | 1.2  | 3     | 1.36 | 1.80E-40    | 4.77E-41    |
| Slc46a1       | 0.7  | 1.8   | 1.36 | 1.39E-11    | 9.59E-12    |
| H2-M3         | 0.7  | 1.7   | 1.36 | 1.28E-08    | 1.07E-08    |
| Kif20a        | 0.4  | 1     | 1.36 | 5.87E-12    | 3.96E-12    |
| Rbl1          | 0.4  | 1     | 1.36 | 7.18E-12    | 4.87E-12    |
| Bin2          | 0.4  | 1     | 1.36 | 7.10E-07    | 6.75E-07    |
| Col3a1        | 79.5 | 200.3 | 1.35 | 0           | 0           |
| Krt8          | 9.6  | 24.2  | 1.35 | 2.56E-126   | 2.34E-127   |
| Ifi35         | 7.4  | 18.5  | 1.35 | 1.34E-72    | 2.11E-73    |
| Steap3        | 6.8  | 17.2  | 1.35 | 1.26E-137   | 1.06E-138   |
| Hmgb2         | 4.6  | 11.9  | 1.35 | 4.54E-42    | 1.16E-42    |
| Coro1a        | 2.3  | 5.7   | 1.35 | 5.17E-29    | 1.83E-29    |
| Ggcx          | 1.6  | 4     | 1.35 | 1.52E-35    | 4.48E-36    |
| Eme2          | 1.3  | 3.2   | 1.35 | 1.33E-15    | 7.51E-16    |
| Cdca3         | 1.1  | 3     | 1.35 | 1.61E-14    | 9.55E-15    |
| Sdf2l1        | 1.1  | 2.6   | 1.35 | 6.47E-10    | 4.94E-10    |
| Pigb          | 0.8  | 2.1   | 1.35 | 3.92E-14    | 2.37E-14    |
| Primpol       | 0.5  | 1.2   | 1.35 | 3.16E-15    | 1.81E-15    |
| Adamts14      | 0.4  | 1.1   | 1.35 | 1.86E-17    | 9.64E-18    |
| Gm684         | 0.4  | 1.1   | 1.35 | 1.23E-05    | 1.30E-05    |
| Azin1         | 10.1 | 26.7  | 1.34 | 5.34E-295   | 2.23E-296   |
| Lrrc51        | 4    | 10.3  | 1.34 | 1.93E-26    | 7.28E-27    |
| Irf1          | 2.5  | 6.4   | 1.34 | 8.49E-40    | 2.28E-40    |
| Rgs2          | 2.2  | 5.5   | 1.34 | 2.43E-48    | 5.45E-49    |
| Tspan6        | 1.8  | 4.5   | 1.34 | 1.42E-23    | 5.92E-24    |
| Col8a1        | 1.7  | 4.3   | 1.34 | 2.53E-64    | 4.44E-65    |
| Ripply1       | 1.3  | 3.3   | 1.34 | 1.06E-07    | 9.41E-08    |

|               |       |       |      |             |             |
|---------------|-------|-------|------|-------------|-------------|
| Il17d         | 0.9   | 2.2   | 1.34 | 2.53E-09    | 2.00E-09    |
| Psmc3ip       | 0.6   | 1.6   | 1.34 | 1.06E-05    | 1.11E-05    |
| Plekha7       | 0.5   | 1.4   | 1.34 | 7.35E-19    | 3.57E-19    |
| Efna2         | 0.4   | 1.1   | 1.34 | 3.07E-08    | 2.63E-08    |
| Mfap2         | 10.6  | 25.5  | 1.33 | 4.38E-76    | 6.57E-77    |
| Gm7325        | 2.4   | 6     | 1.33 | 6.50E-15    | 3.77E-15    |
| Fsd11         | 1.5   | 3.9   | 1.33 | 6.11E-80    | 8.70E-81    |
| Lmnb2         | 1.5   | 3.7   | 1.33 | 2.34E-37    | 6.68E-38    |
| Osbpl6        | 1.2   | 3     | 1.33 | 2.33E-69    | 3.83E-70    |
| Kbtbd3        | 1.1   | 2.8   | 1.33 | 8.28E-21    | 3.76E-21    |
| Mcm3          | 1     | 2.6   | 1.33 | 2.23E-22    | 9.63E-23    |
| Chad          | 0.9   | 2.4   | 1.33 | 2.50E-12    | 1.65E-12    |
| Ncf4          | 0.9   | 2.1   | 1.33 | 3.11E-09    | 2.48E-09    |
| Clec4n        | 0.9   | 2     | 1.33 | 2.26E-08    | 1.92E-08    |
| Xxylt1        | 0.8   | 1.9   | 1.33 | 1.06E-16    | 5.66E-17    |
| Uhrf1         | 0.5   | 1.3   | 1.33 | 1.52E-13    | 9.44E-14    |
| B2m           | 135.3 | 333.8 | 1.32 | 0           | 0           |
| Lbh           | 3.2   | 8     | 1.32 | 3.56E-70    | 5.78E-71    |
| Creb3l1       | 2.6   | 6.4   | 1.32 | 3.74E-42    | 9.55E-43    |
| Prmt2         | 1.8   | 4.5   | 1.32 | 1.59E-27    | 5.83E-28    |
| Gm3435        | 0.9   | 2.2   | 1.32 | 1.72E-11    | 1.19E-11    |
| Duoxa1        | 0.7   | 1.8   | 1.32 | 1.00E-08    | 8.29E-09    |
| L3hypdh       | 0.5   | 1.3   | 1.32 | 1.43E-07    | 1.28E-07    |
| Tsc22d4       | 23.7  | 58.4  | 1.31 | 0           | 0           |
| Cotl1         | 6.8   | 16.7  | 1.31 | 8.36E-77    | 1.24E-77    |
| Ctnna3        | 0.9   | 2.3   | 1.31 | 6.63E-20    | 3.11E-20    |
| B4galt2       | 0.9   | 2.1   | 1.31 | 8.05E-16    | 4.48E-16    |
| Endod1        | 0.8   | 1.9   | 1.31 | 6.52E-23    | 2.77E-23    |
| 1700016C15Rik | 0.6   | 1.5   | 1.31 | 0.000189332 | 0.000227149 |
| B4galt6       | 0.6   | 1.5   | 1.31 | 7.36E-26    | 2.82E-26    |
| S1pr2         | 0.5   | 1.3   | 1.31 | 5.08E-12    | 3.41E-12    |
| Odf3l1        | 0.5   | 1.1   | 1.31 | 9.67E-05    | 0.000112157 |
| Angptl2       | 24    | 58.7  | 1.3  | 0           | 0           |
| Cbr2          | 4.5   | 11.4  | 1.3  | 4.15E-29    | 1.46E-29    |
| Lamb1         | 3.2   | 7.9   | 1.3  | 1.44E-123   | 1.33E-124   |
| Rccd1         | 1.6   | 4.1   | 1.3  | 3.01E-27    | 1.11E-27    |
| Col26a1       | 1.5   | 3.8   | 1.3  | 2.57E-29    | 8.97E-30    |
| Ass1          | 1.4   | 3.5   | 1.3  | 6.00E-17    | 3.17E-17    |
| D3Erttd751e   | 0.7   | 1.8   | 1.3  | 8.64E-15    | 5.05E-15    |
| Cd109         | 0.6   | 1.4   | 1.3  | 1.35E-24    | 5.39E-25    |
| Spry4         | 0.6   | 1.3   | 1.3  | 2.29E-18    | 1.14E-18    |
| Igfbp4        | 21.7  | 52.5  | 1.29 | 1.94E-293   | 8.17E-295   |
| Dbn1          | 3.9   | 9.5   | 1.29 | 4.13E-76    | 6.19E-77    |
| Sulf2         | 3     | 7.2   | 1.29 | 4.59E-73    | 7.20E-74    |
| Fbxw17        | 1.7   | 4     | 1.29 | 1.99E-20    | 9.17E-21    |
| Gstt1         | 1.4   | 3.3   | 1.29 | 1.24E-10    | 9.01E-11    |
| Prpsap2       | 1.2   | 2.8   | 1.29 | 1.22E-14    | 7.21E-15    |
| Hps4          | 1     | 2.6   | 1.29 | 2.75E-22    | 1.19E-22    |
| Creb5         | 0.6   | 1.5   | 1.29 | 1.37E-30    | 4.64E-31    |

|               |       |       |      |           |           |
|---------------|-------|-------|------|-----------|-----------|
| Aldh1a2       | 0.5   | 1.3   | 1.29 | 3.95E-09  | 3.18E-09  |
| E430018J23Rik | 0.4   | 1.1   | 1.29 | 2.48E-07  | 2.27E-07  |
| Stmn2         | 0.5   | 1.1   | 1.29 | 2.48E-07  | 2.26E-07  |
| Sparc         | 129.2 | 310.5 | 1.28 | 0         | 0         |
| LOC102634333  | 7.3   | 17.7  | 1.28 | 0         | 0         |
| Atf3          | 4.8   | 11.5  | 1.28 | 3.05E-62  | 5.49E-63  |
| Wfdc17        | 3.1   | 7.4   | 1.28 | 1.75E-10  | 1.29E-10  |
| Nudt18        | 2.3   | 5.6   | 1.28 | 1.48E-27  | 5.41E-28  |
| Tmem218       | 2.2   | 5.6   | 1.28 | 1.77E-16  | 9.53E-17  |
| Commd10       | 1.9   | 4.6   | 1.28 | 6.61E-20  | 3.10E-20  |
| Mmgt2         | 1.7   | 4.2   | 1.28 | 9.02E-19  | 4.40E-19  |
| Itih5         | 1.5   | 3.6   | 1.28 | 4.43E-77  | 6.52E-78  |
| Col12a1       | 1.2   | 3     | 1.28 | 7.63E-84  | 1.05E-84  |
| Hist1h2be     | 1.3   | 1.8   | 1.28 | 1.13E-11  | 7.74E-12  |
| Cntrob        | 0.7   | 1.8   | 1.28 | 4.07E-18  | 2.04E-18  |
| Cdk5r1        | 0.6   | 1.5   | 1.28 | 9.02E-19  | 4.40E-19  |
| Tmeff1        | 0.5   | 1.1   | 1.28 | 8.89E-09  | 7.31E-09  |
| Dtymk         | 7.6   | 18.1  | 1.27 | 1.38E-39  | 3.72E-40  |
| Ccdc80        | 5.2   | 12.2  | 1.27 | 3.46E-113 | 3.50E-114 |
| Chtf8         | 4.7   | 11.3  | 1.27 | 2.23E-86  | 2.98E-87  |
| Praf2         | 3.4   | 8.1   | 1.27 | 1.10E-26  | 4.15E-27  |
| St3gal4       | 1.8   | 4.3   | 1.27 | 8.18E-70  | 1.34E-70  |
| Aqp7          | 1.7   | 3.8   | 1.27 | 2.47E-25  | 9.64E-26  |
| Slc2a12       | 0.8   | 1.9   | 1.27 | 2.17E-19  | 1.04E-19  |
| Ica1          | 0.5   | 1.4   | 1.27 | 1.54E-07  | 1.39E-07  |
| Begain        | 0.5   | 1.3   | 1.27 | 2.11E-10  | 1.56E-10  |
| Plk1          | 0.6   | 1.3   | 1.27 | 3.45E-09  | 2.76E-09  |
| Nrn1          | 0.5   | 1.3   | 1.27 | 5.81E-07  | 5.48E-07  |
| Tifab         | 0.5   | 1.2   | 1.27 | 9.31E-11  | 6.75E-11  |
| Dagla         | 0.5   | 1.2   | 1.27 | 1.85E-18  | 9.15E-19  |
| S100a11       | 46.5  | 109.8 | 1.26 | 1.38E-135 | 1.18E-136 |
| Psmel         | 24.6  | 58.7  | 1.26 | 9.24E-145 | 7.41E-146 |
| Morn2         | 6.2   | 13.9  | 1.26 | 3.98E-24  | 1.62E-24  |
| Fkbp10        | 4.5   | 10.5  | 1.26 | 1.70E-72  | 2.68E-73  |
| Akr1b8        | 4     | 9.4   | 1.26 | 1.33E-32  | 4.24E-33  |
| Neu3          | 1     | 2.5   | 1.26 | 3.41E-23  | 1.43E-23  |
| Accs          | 0.5   | 1.2   | 1.26 | 2.61E-13  | 1.64E-13  |
| Psmb10        | 7.2   | 17.2  | 1.25 | 1.94E-57  | 3.73E-58  |
| Srek1ip1      | 4.4   | 10.3  | 1.25 | 1.17E-47  | 2.67E-48  |
| Gng10         | 3.5   | 8.3   | 1.25 | 7.37E-25  | 2.92E-25  |
| Cd44          | 2.9   | 6.9   | 1.25 | 6.17E-80  | 8.80E-81  |
| LOC108167320  | 2.3   | 5.5   | 1.25 | 7.24E-10  | 5.54E-10  |
| P3h3          | 2.2   | 5.1   | 1.25 | 6.38E-36  | 1.87E-36  |
| Pgpep11       | 1.4   | 3.2   | 1.25 | 6.88E-11  | 4.95E-11  |
| Sema6a        | 1.3   | 3     | 1.25 | 5.23E-53  | 1.08E-53  |
| Gm12942       | 0.9   | 2.1   | 1.25 | 1.58E-07  | 1.42E-07  |
| Lyplal1       | 0.8   | 1.9   | 1.25 | 1.57E-08  | 1.32E-08  |
| Prrg3         | 0.8   | 1.8   | 1.25 | 3.69E-29  | 1.29E-29  |
| Nipa1         | 0.5   | 1.2   | 1.25 | 1.85E-07  | 1.68E-07  |

|          |      |       |      |           |           |
|----------|------|-------|------|-----------|-----------|
| E2f1     | 0.5  | 1.2   | 1.25 | 1.30E-09  | 1.01E-09  |
| Pcolce   | 19.9 | 46.9  | 1.24 | 8.75E-184 | 5.46E-185 |
| Col6a1   | 19.6 | 45.6  | 1.24 | 0         | 0         |
| Casp7    | 1    | 2.4   | 1.24 | 9.98E-16  | 5.59E-16  |
| Gm3558   | 0.8  | 1.8   | 1.24 | 4.04E-11  | 2.87E-11  |
| Fam84b   | 0.5  | 1.1   | 1.24 | 8.99E-17  | 4.78E-17  |
| Cfl1     | 70.2 | 162.7 | 1.23 | 0         | 0         |
| Igfbp7   | 62.2 | 145   | 1.23 | 0         | 0         |
| Postn    | 45.3 | 103.3 | 1.23 | 0         | 0         |
| Mpp1     | 5.2  | 12    | 1.23 | 7.48E-77  | 1.11E-77  |
| Fbxw7    | 4.4  | 10.7  | 1.23 | 5.96E-103 | 6.67E-104 |
| Chrng    | 2.5  | 5.7   | 1.23 | 3.01E-28  | 1.08E-28  |
| Bhlhb9   | 1.4  | 3.2   | 1.23 | 5.67E-24  | 2.33E-24  |
| Fzd10    | 0.8  | 1.8   | 1.23 | 8.59E-15  | 5.02E-15  |
| Sp140    | 0.8  | 1.7   | 1.23 | 4.36E-10  | 3.29E-10  |
| Ccdc8    | 0.7  | 1.6   | 1.23 | 1.16E-09  | 8.99E-10  |
| Raver2   | 0.5  | 1.2   | 1.23 | 5.25E-13  | 3.36E-13  |
| Myoz3    | 25   | 58.6  | 1.22 | 0         | 0         |
| Dap      | 9.1  | 21.1  | 1.22 | 2.57E-77  | 3.77E-78  |
| Tra2a    | 7.4  | 18.3  | 1.22 | 2.27E-92  | 2.85E-93  |
| Ikbip    | 3.3  | 7.1   | 1.22 | 7.85E-31  | 2.64E-31  |
| Alg2     | 2.7  | 6.3   | 1.22 | 4.26E-48  | 9.58E-49  |
| Nme4     | 2.7  | 6.1   | 1.22 | 2.75E-14  | 1.65E-14  |
| Adamts20 | 2.1  | 5.4   | 1.22 | 3.72E-88  | 4.88E-89  |
| Tmem119  | 2    | 4.6   | 1.22 | 1.60E-25  | 6.19E-26  |
| Mcm6     | 1.4  | 3.2   | 1.22 | 5.86E-26  | 2.24E-26  |
| H2-T24   | 1    | 2.5   | 1.22 | 9.04E-13  | 5.85E-13  |
| AW551984 | 1    | 2.3   | 1.22 | 7.99E-23  | 3.40E-23  |
| Rbm43    | 0.8  | 1.8   | 1.22 | 1.38E-10  | 1.01E-10  |
| Ifitm3   | 61.8 | 141.4 | 1.21 | 2.91E-214 | 1.53E-215 |
| Ifi27    | 13.7 | 31.6  | 1.21 | 1.03E-78  | 1.49E-79  |
| Lum      | 13.5 | 30.9  | 1.21 | 9.33E-157 | 6.92E-158 |
| Nes      | 10.6 | 24.2  | 1.21 | 0         | 0         |
| Txndc5   | 9.8  | 22.6  | 1.21 | 2.45E-147 | 1.91E-148 |
| Fap      | 2.3  | 5.1   | 1.21 | 8.62E-31  | 2.90E-31  |
| Arsb     | 1    | 2.4   | 1.21 | 8.05E-25  | 3.19E-25  |
| Ptprcap  | 0.8  | 1.8   | 1.21 | 3.20E-05  | 3.53E-05  |
| Nudt17   | 0.6  | 1.4   | 1.21 | 8.91E-06  | 9.29E-06  |
| Clec3b   | 7.3  | 16.6  | 1.2  | 6.96E-41  | 1.83E-41  |
| Cthrc1   | 5.3  | 11.8  | 1.2  | 3.41E-33  | 1.07E-33  |
| Sh3kbp1  | 4.8  | 11.2  | 1.2  | 3.62E-96  | 4.33E-97  |
| Gngt2    | 4    | 9.4   | 1.2  | 9.36E-15  | 5.48E-15  |
| Cercam   | 2.4  | 5.8   | 1.2  | 5.69E-32  | 1.84E-32  |
| Ccdc34   | 2.4  | 5.4   | 1.2  | 1.41E-28  | 5.05E-29  |
| Faap100  | 2.1  | 4.9   | 1.2  | 1.12E-38  | 3.09E-39  |
| Comtd1   | 1.7  | 3.8   | 1.2  | 6.86E-22  | 3.01E-22  |
| Cfb      | 1.2  | 2.7   | 1.2  | 1.30E-19  | 6.15E-20  |
| Msx1     | 1    | 2.2   | 1.2  | 8.61E-12  | 5.86E-12  |
| Anxa2    | 23.9 | 53.6  | 1.19 | 8.04E-177 | 5.22E-178 |

|               |      |      |      |           |           |
|---------------|------|------|------|-----------|-----------|
| Tmem8c        | 18   | 40.5 | 1.19 | 6.89E-127 | 6.26E-128 |
| Sec61b        | 15.7 | 35.8 | 1.19 | 1.43E-45  | 3.38E-46  |
| Ostc          | 14.6 | 33.1 | 1.19 | 5.68E-84  | 7.79E-85  |
| Lsm3          | 14.3 | 32.3 | 1.19 | 2.80E-47  | 6.41E-48  |
| Vwa1          | 4.4  | 10   | 1.19 | 1.21E-45  | 2.86E-46  |
| Hrasls        | 4.1  | 9.4  | 1.19 | 8.42E-66  | 1.45E-66  |
| Plau          | 2.7  | 6    | 1.19 | 1.77E-33  | 5.52E-34  |
| Rpa3          | 2.6  | 5.8  | 1.19 | 3.74E-10  | 2.81E-10  |
| Cdc42ep5      | 2.3  | 5.1  | 1.19 | 1.41E-11  | 9.73E-12  |
| Tk1           | 2    | 4.5  | 1.19 | 2.65E-15  | 1.51E-15  |
| Prss53        | 1    | 2.5  | 1.19 | 4.05E-17  | 2.12E-17  |
| Egflam        | 1    | 2.4  | 1.19 | 4.20E-21  | 1.89E-21  |
| Smim1         | 1    | 2    | 1.19 | 5.32E-15  | 3.08E-15  |
| Syt12         | 0.8  | 1.8  | 1.19 | 1.46E-15  | 8.27E-16  |
| Fgd1          | 0.5  | 1.2  | 1.19 | 4.66E-12  | 3.12E-12  |
| Olfml1        | 0.5  | 1.1  | 1.19 | 9.96E-07  | 9.57E-07  |
| 1700037H04Rik | 4.6  | 10.2 | 1.18 | 6.38E-31  | 2.14E-31  |
| Mettl11b      | 2.4  | 5.4  | 1.18 | 2.37E-14  | 1.41E-14  |
| Hdac11        | 2.4  | 5.4  | 1.18 | 1.69E-29  | 5.86E-30  |
| Ccdc163       | 2    | 4.7  | 1.18 | 3.31E-15  | 1.90E-15  |
| Plod2         | 2    | 4.5  | 1.18 | 4.29E-40  | 1.14E-40  |
| Emid1         | 1.6  | 3.6  | 1.18 | 5.49E-16  | 3.03E-16  |
| Tmem106a      | 1.6  | 3.5  | 1.18 | 9.45E-21  | 4.31E-21  |
| Ptpn18        | 1.5  | 3.4  | 1.18 | 2.35E-13  | 1.47E-13  |
| Plac8         | 1.1  | 2.7  | 1.18 | 5.19E-06  | 5.30E-06  |
| Nmrall        | 1    | 2.3  | 1.18 | 2.67E-09  | 2.12E-09  |
| Epb414a       | 0.6  | 1.4  | 1.18 | 7.24E-12  | 4.92E-12  |
| Cchr1         | 0.6  | 1.3  | 1.18 | 8.47E-10  | 6.52E-10  |
| Wbp5          | 18.7 | 41.8 | 1.17 | 4.95E-97  | 5.83E-98  |
| Pisd          | 15.1 | 33.3 | 1.17 | 7.37E-174 | 4.91E-175 |
| Selm          | 13.5 | 30.1 | 1.17 | 7.84E-61  | 1.44E-61  |
| Rgs10         | 5.4  | 12   | 1.17 | 4.35E-25  | 1.71E-25  |
| Metrn         | 5.2  | 11.7 | 1.17 | 4.77E-37  | 1.37E-37  |
| Fam171a2      | 2.4  | 5.3  | 1.17 | 2.56E-39  | 6.94E-40  |
| C330018D20Rik | 1.8  | 4.1  | 1.17 | 1.11E-23  | 4.60E-24  |
| Clec4a3       | 1.1  | 2.4  | 1.17 | 6.04E-08  | 5.28E-08  |
| Iqcg          | 0.8  | 1.9  | 1.17 | 1.23E-18  | 6.05E-19  |
| Trdmt1        | 0.6  | 1.3  | 1.17 | 4.31E-12  | 2.88E-12  |
| Fbxo27        | 0.5  | 1.1  | 1.17 | 3.15E-06  | 3.16E-06  |
| LOC102638183  | 6.3  | 13.9 | 1.16 | 3.43E-13  | 2.16E-13  |
| 4-Sep         | 6.2  | 13.7 | 1.16 | 5.75E-44  | 1.41E-44  |
| Fkbp7         | 6    | 13.2 | 1.16 | 7.11E-28  | 2.58E-28  |
| Arap1         | 3.5  | 8    | 1.16 | 7.82E-65  | 1.37E-65  |
| Vcpkmt        | 3.1  | 6.8  | 1.16 | 7.26E-19  | 3.53E-19  |
| Pf4           | 2.8  | 6.1  | 1.16 | 1.16E-09  | 9.03E-10  |
| Dtx3l         | 1.7  | 3.8  | 1.16 | 8.65E-46  | 2.03E-46  |
| Casp8         | 1.6  | 3.6  | 1.16 | 2.82E-21  | 1.26E-21  |
| Golm1         | 1.4  | 3.2  | 1.16 | 3.66E-27  | 1.35E-27  |
| Pik3cd        | 1.3  | 3.1  | 1.16 | 1.04E-31  | 3.41E-32  |



|               |      |       |      |             |             |
|---------------|------|-------|------|-------------|-------------|
| Tmem185b      | 1.1  | 2.4   | 1.16 | 4.62E-17    | 2.43E-17    |
| Pdia5         | 1    | 2.3   | 1.16 | 7.17E-11    | 5.17E-11    |
| Siae          | 0.8  | 1.9   | 1.16 | 6.38E-16    | 3.53E-16    |
| Mboat1        | 0.7  | 1.4   | 1.16 | 4.35E-10    | 3.28E-10    |
| Gpr65         | 0.6  | 1.4   | 1.16 | 2.63E-08    | 2.25E-08    |
| Plekhn1       | 0.6  | 1.4   | 1.16 | 2.23E-08    | 1.89E-08    |
| Ptma          | 70.6 | 154.8 | 1.15 | 0           | 0           |
| Aig1          | 6.1  | 12.9  | 1.15 | 2.09E-46    | 4.84E-47    |
| Supt3         | 5    | 12.1  | 1.15 | 9.83E-32    | 3.21E-32    |
| Slfn5         | 3.3  | 7.4   | 1.15 | 1.88E-101   | 2.13E-102   |
| Pycr1         | 2.6  | 6.2   | 1.15 | 3.54E-27    | 1.31E-27    |
| Casp3         | 2    | 4.5   | 1.15 | 8.07E-26    | 3.10E-26    |
| Mall          | 1.9  | 4.2   | 1.15 | 1.24E-19    | 5.90E-20    |
| Parp12        | 1.2  | 2.7   | 1.15 | 1.27E-21    | 5.63E-22    |
| Senp8         | 1.1  | 2.4   | 1.15 | 1.51E-21    | 6.68E-22    |
| Grtp1         | 1    | 2.4   | 1.15 | 3.63E-09    | 2.92E-09    |
| Tppp3         | 18.6 | 44.4  | 1.14 | 3.49E-110   | 3.66E-111   |
| Ppic          | 14.3 | 31.2  | 1.14 | 1.79E-88    | 2.33E-89    |
| Snrpd1        | 10.4 | 22.8  | 1.14 | 3.14E-42    | 8.01E-43    |
| Ssc5d         | 4.9  | 10.6  | 1.14 | 3.03E-103   | 3.38E-104   |
| Gpx7          | 4.8  | 10.5  | 1.14 | 7.69E-29    | 2.73E-29    |
| Impa2         | 3.8  | 8.2   | 1.14 | 2.45E-26    | 9.29E-27    |
| Lysmd2        | 3.5  | 7.8   | 1.14 | 1.46E-21    | 6.48E-22    |
| Tmem173       | 2.4  | 5.1   | 1.14 | 9.21E-25    | 3.66E-25    |
| Arhgef15      | 2.2  | 4.8   | 1.14 | 6.81E-45    | 1.63E-45    |
| Ppm1f         | 2    | 4.3   | 1.14 | 2.39E-47    | 5.48E-48    |
| Tvp23b        | 1.3  | 2.9   | 1.14 | 1.60E-12    | 1.05E-12    |
| Podn          | 1.3  | 2.9   | 1.14 | 3.87E-17    | 2.03E-17    |
| Ptrh1         | 1    | 2.2   | 1.14 | 6.70E-06    | 6.93E-06    |
| Mcm4          | 1    | 2.1   | 1.14 | 2.76E-18    | 1.38E-18    |
| Chsy1         | 0.8  | 1.8   | 1.14 | 6.28E-17    | 3.32E-17    |
| Ints2         | 0.6  | 1.3   | 1.14 | 1.44E-18    | 7.11E-19    |
| F2r13         | 0.5  | 1.3   | 1.14 | 6.01E-07    | 5.67E-07    |
| Spon1         | 0.6  | 1.3   | 1.14 | 1.99E-19    | 9.50E-20    |
| Igsf3         | 0.6  | 1.2   | 1.14 | 3.26E-21    | 1.46E-21    |
| My19          | 14.7 | 32    | 1.13 | 2.36E-76    | 3.51E-77    |
| Zfp385b       | 5.4  | 11.8  | 1.13 | 5.17E-71    | 8.32E-72    |
| 2210016F16Rik | 3.6  | 7.9   | 1.13 | 5.67E-50    | 1.24E-50    |
| Tap2          | 2.9  | 6.3   | 1.13 | 1.21E-35    | 3.57E-36    |
| Arhgap18      | 1.5  | 3.2   | 1.13 | 1.03E-26    | 3.87E-27    |
| Dusp19        | 1.3  | 2.9   | 1.13 | 1.56E-10    | 1.15E-10    |
| Zfp827        | 1.4  | 2.9   | 1.13 | 1.13E-52    | 2.35E-53    |
| Rap2b         | 1.3  | 2.8   | 1.13 | 4.48E-27    | 1.66E-27    |
| Slc22a17      | 1.2  | 2.7   | 1.13 | 5.87E-15    | 3.40E-15    |
| 3110009E18Rik | 1.2  | 2.5   | 1.13 | 0.000140855 | 0.000166593 |
| Hvcn1         | 0.9  | 2.1   | 1.13 | 3.37E-13    | 2.12E-13    |
| Nup35         | 0.8  | 1.8   | 1.13 | 2.59E-12    | 1.71E-12    |
| Tmem35        | 0.8  | 1.8   | 1.13 | 4.92E-09    | 3.97E-09    |
| Ttc30b        | 0.7  | 1.6   | 1.13 | 1.34E-10    | 9.80E-11    |

|               |      |       |      |           |           |
|---------------|------|-------|------|-----------|-----------|
| Serpinb8      | 0.7  | 1.5   | 1.13 | 3.22E-13  | 2.03E-13  |
| Cyp51         | 0.6  | 1.4   | 1.13 | 2.77E-14  | 1.66E-14  |
| Cntnap1       | 0.5  | 1.2   | 1.13 | 6.94E-15  | 4.03E-15  |
| Myo1g         | 0.5  | 1.1   | 1.13 | 2.17E-09  | 1.72E-09  |
| Aimp2         | 63.8 | 142.6 | 1.12 | 0         | 0         |
| C1qa          | 35.8 | 76.5  | 1.12 | 2.78E-175 | 1.82E-176 |
| Snrpf         | 12.9 | 28    | 1.12 | 4.88E-52  | 1.03E-52  |
| Serfl         | 9    | 19.3  | 1.12 | 8.52E-26  | 3.28E-26  |
| Pop7          | 6.6  | 14.2  | 1.12 | 7.18E-25  | 2.84E-25  |
| Sdc2          | 5.1  | 11    | 1.12 | 5.07E-80  | 7.21E-81  |
| Copg2         | 3.4  | 7.3   | 1.12 | 4.97E-64  | 8.77E-65  |
| Clec7a        | 2.7  | 5.9   | 1.12 | 1.18E-28  | 4.21E-29  |
| Chst14        | 1.2  | 2.5   | 1.12 | 1.11E-12  | 7.19E-13  |
| Lrrcc1        | 1.1  | 2.5   | 1.12 | 6.99E-28  | 2.54E-28  |
| Pdzd7         | 1.1  | 2.4   | 1.12 | 1.15E-21  | 5.08E-22  |
| Ctbs          | 0.7  | 1.6   | 1.12 | 4.14E-11  | 2.94E-11  |
| Galnt5        | 0.7  | 1.5   | 1.12 | 1.82E-17  | 9.41E-18  |
| Proser2       | 0.5  | 1.1   | 1.12 | 1.80E-09  | 1.41E-09  |
| H2-T22        | 7.1  | 15.3  | 1.11 | 1.73E-55  | 3.42E-56  |
| Hmgb3         | 3.9  | 8.8   | 1.11 | 4.23E-31  | 1.41E-31  |
| P4ha1         | 3.8  | 8.2   | 1.11 | 3.68E-70  | 5.99E-71  |
| Ybx2          | 3.2  | 7.6   | 1.11 | 7.53E-28  | 2.74E-28  |
| Med19         | 3.3  | 7.1   | 1.11 | 2.23E-32  | 7.15E-33  |
| Nme3          | 2.7  | 5.9   | 1.11 | 3.99E-10  | 3.00E-10  |
| Fam3c         | 2.5  | 5.3   | 1.11 | 4.07E-32  | 1.31E-32  |
| Slc25a1       | 1.7  | 3.7   | 1.11 | 1.50E-14  | 8.86E-15  |
| Rps6ka1       | 1.2  | 2.5   | 1.11 | 1.09E-17  | 5.60E-18  |
| Tmem44        | 1    | 2.3   | 1.11 | 2.55E-18  | 1.27E-18  |
| Zfp13         | 0.7  | 1.6   | 1.11 | 1.28E-08  | 1.07E-08  |
| Lpar4         | 0.5  | 1.1   | 1.11 | 1.27E-11  | 8.75E-12  |
| Coa3          | 37.2 | 79.5  | 1.1  | 2.76E-115 | 2.75E-116 |
| Psme2         | 15   | 33.3  | 1.1  | 8.16E-59  | 1.54E-59  |
| Pak1          | 12.7 | 27.2  | 1.1  | 1.93E-175 | 1.26E-176 |
| Sox18         | 10.4 | 22.1  | 1.1  | 2.88E-75  | 4.38E-76  |
| Ehd2          | 10.3 | 21.9  | 1.1  | 4.01E-235 | 1.97E-236 |
| Bphl          | 7.5  | 16    | 1.1  | 2.91E-41  | 7.59E-42  |
| Gm572         | 5.9  | 12.7  | 1.1  | 4.71E-65  | 8.18E-66  |
| Sdpr          | 5.8  | 12.3  | 1.1  | 1.24E-80  | 1.76E-81  |
| Sec14l5       | 5.4  | 11.5  | 1.1  | 2.03E-143 | 1.65E-144 |
| Tmem176a      | 5.1  | 11    | 1.1  | 2.32E-24  | 9.36E-25  |
| Foxo6         | 4.1  | 8.9   | 1.1  | 3.86E-44  | 9.42E-45  |
| Pigh          | 2.2  | 4.7   | 1.1  | 5.00E-25  | 1.97E-25  |
| Cacnb3        | 1.9  | 4.1   | 1.1  | 5.30E-23  | 2.24E-23  |
| Magix         | 1.7  | 3.8   | 1.1  | 4.36E-23  | 1.84E-23  |
| Neur13        | 1.7  | 3.6   | 1.1  | 3.85E-21  | 1.73E-21  |
| Fam229b       | 1.7  | 3.6   | 1.1  | 7.80E-07  | 7.44E-07  |
| F830016B08Rik | 1.6  | 3.4   | 1.1  | 3.89E-26  | 1.48E-26  |
| Cbx8          | 1.1  | 2     | 1.1  | 8.96E-09  | 7.38E-09  |
| Epb41l3       | 0.9  | 1.9   | 1.1  | 3.55E-17  | 1.86E-17  |

|               |      |      |      |             |             |
|---------------|------|------|------|-------------|-------------|
| Tcaf2         | 0.7  | 1.4  | 1.1  | 5.38E-14    | 3.26E-14    |
| Srpk3         | 22.7 | 48.1 | 1.09 | 3.06E-198   | 1.79E-199   |
| Cyba          | 19.8 | 41.8 | 1.09 | 5.12E-65    | 8.91E-66    |
| Prkcdpb       | 15.5 | 32.7 | 1.09 | 1.76E-68    | 2.94E-69    |
| Tceal8        | 11.1 | 23.5 | 1.09 | 6.68E-111   | 6.96E-112   |
| Tnfaip2       | 10.5 | 22.2 | 1.09 | 2.24E-162   | 1.60E-163   |
| Tmem88        | 5.7  | 12.1 | 1.09 | 1.19E-40    | 3.15E-41    |
| Rnpep         | 5.2  | 11   | 1.09 | 6.01E-52    | 1.26E-52    |
| Mina          | 4.5  | 9.6  | 1.09 | 1.18E-43    | 2.92E-44    |
| Mmab          | 4.5  | 9.5  | 1.09 | 2.02E-59    | 3.78E-60    |
| Plpp5         | 3.6  | 7.4  | 1.09 | 7.69E-24    | 3.17E-24    |
| Ephx2         | 3    | 6.3  | 1.09 | 7.52E-28    | 2.73E-28    |
| Fam43a        | 2.5  | 5.4  | 1.09 | 3.55E-35    | 1.06E-35    |
| Ppp1r14a      | 1.3  | 2.8  | 1.09 | 0.000223737 | 0.000270942 |
| Alg6          | 1.3  | 2.6  | 1.09 | 1.20E-14    | 7.06E-15    |
| Elp6          | 1.1  | 2.3  | 1.09 | 3.80E-11    | 2.69E-11    |
| Adam33        | 0.9  | 1.8  | 1.09 | 7.72E-17    | 4.09E-17    |
| Samd9l        | 0.7  | 1.5  | 1.09 | 7.13E-18    | 3.62E-18    |
| Mchr1         | 0.5  | 1.1  | 1.09 | 2.94E-06    | 2.94E-06    |
| Ubxn1l        | 0.5  | 1.1  | 1.09 | 5.89E-05    | 6.67E-05    |
| Tubb5         | 19.2 | 40.2 | 1.08 | 1.42E-216   | 7.41E-218   |
| G0s2          | 13.3 | 27.7 | 1.08 | 1.22E-47    | 2.79E-48    |
| Thyn1         | 12.3 | 26.2 | 1.08 | 5.51E-49    | 1.22E-49    |
| Anxa1         | 11.7 | 24.3 | 1.08 | 3.11E-69    | 5.12E-70    |
| Npm3          | 9    | 19   | 1.08 | 9.10E-34    | 2.81E-34    |
| Msrb2         | 4.8  | 10.3 | 1.08 | 8.38E-26    | 3.22E-26    |
| Rftn1         | 4.3  | 8.9  | 1.08 | 1.13E-52    | 2.34E-53    |
| Myo1e         | 3.3  | 7    | 1.08 | 4.51E-69    | 7.45E-70    |
| Tcaf1         | 3.3  | 6.7  | 1.08 | 3.30E-72    | 5.23E-73    |
| Prcp          | 2.3  | 4.9  | 1.08 | 4.28E-31    | 1.43E-31    |
| Trim68        | 1.8  | 3.9  | 1.08 | 5.28E-20    | 2.47E-20    |
| Ddx58         | 1.3  | 2.8  | 1.08 | 3.86E-29    | 1.35E-29    |
| Six5          | 1.1  | 2.2  | 1.08 | 1.54E-14    | 9.13E-15    |
| Stxbp1        | 0.9  | 1.9  | 1.08 | 3.34E-16    | 1.82E-16    |
| D8Ert82e      | 0.7  | 1.5  | 1.08 | 1.28E-15    | 7.19E-16    |
| Zfp57         | 0.5  | 1.3  | 1.08 | 6.40E-07    | 6.05E-07    |
| Syce2         | 0.6  | 1.2  | 1.08 | 0.000859645 | 0.001117822 |
| Prss23        | 29.3 | 61.2 | 1.07 | 9.22E-241   | 4.43E-242   |
| Cd93          | 6.9  | 14.4 | 1.07 | 2.58E-191   | 1.55E-192   |
| Csrp2         | 5.8  | 11.9 | 1.07 | 2.57E-22    | 1.11E-22    |
| Spa17         | 3.5  | 7.3  | 1.07 | 4.08E-11    | 2.90E-11    |
| Cnp           | 3.2  | 6.5  | 1.07 | 2.16E-30    | 7.35E-31    |
| Hilpda        | 1.8  | 3.7  | 1.07 | 1.60E-08    | 1.34E-08    |
| Ccdc189       | 1.7  | 3.4  | 1.07 | 2.71E-16    | 1.47E-16    |
| Pstpip1       | 1.4  | 2.8  | 1.07 | 1.11E-09    | 8.62E-10    |
| 4930402H24Rik | 1.2  | 2.5  | 1.07 | 3.35E-32    | 1.08E-32    |
| Ddr2          | 1.2  | 2.5  | 1.07 | 5.35E-43    | 1.33E-43    |
| Pdlim2        | 1.1  | 2.2  | 1.07 | 5.05E-08    | 4.39E-08    |
| Mpped2        | 0.9  | 1.9  | 1.07 | 3.45E-11    | 2.44E-11    |

|               |      |      |      |             |             |
|---------------|------|------|------|-------------|-------------|
| Ptprc         | 0.9  | 1.9  | 1.07 | 1.31E-19    | 6.21E-20    |
| Cys1          | 0.8  | 1.6  | 1.07 | 3.06E-09    | 2.44E-09    |
| Cenpp         | 0.7  | 1.5  | 1.07 | 0.000360804 | 0.000447619 |
| Plek          | 0.7  | 1.5  | 1.07 | 3.18E-14    | 1.91E-14    |
| Trim14        | 0.6  | 1.2  | 1.07 | 2.92E-09    | 2.33E-09    |
| Tmem260       | 0.5  | 1.1  | 1.07 | 4.05E-13    | 2.57E-13    |
| Oxct1         | 47.7 | 99.6 | 1.06 | 0           | 0           |
| Hfe           | 7.2  | 15.9 | 1.06 | 2.60E-72    | 4.11E-73    |
| Lman2l        | 6.9  | 14.6 | 1.06 | 1.85E-71    | 2.96E-72    |
| Cdk10         | 5.5  | 11.1 | 1.06 | 7.48E-35    | 2.24E-35    |
| Ly86          | 4.6  | 9.4  | 1.06 | 1.94E-19    | 9.27E-20    |
| Creld2        | 3.2  | 6.6  | 1.06 | 4.70E-19    | 2.27E-19    |
| Sh2d6         | 2.9  | 6.2  | 1.06 | 5.52E-19    | 2.67E-19    |
| Nab2          | 3    | 6.1  | 1.06 | 5.13E-32    | 1.66E-32    |
| BC017158      | 1.3  | 2.6  | 1.06 | 1.86E-13    | 1.16E-13    |
| Gstt3         | 1    | 2    | 1.06 | 9.28E-09    | 7.66E-09    |
| Ap3m2         | 0.9  | 1.9  | 1.06 | 2.14E-14    | 1.28E-14    |
| Ripply3       | 0.9  | 1.8  | 1.06 | 6.48E-07    | 6.13E-07    |
| Map3k5        | 0.8  | 1.6  | 1.06 | 2.44E-18    | 1.21E-18    |
| Susd2         | 0.8  | 1.6  | 1.06 | 8.83E-11    | 6.39E-11    |
| Ncaph         | 0.5  | 1.1  | 1.06 | 3.14E-07    | 2.89E-07    |
| H2-K1         | 47.1 | 96.7 | 1.05 | 0           | 0           |
| Anp32a        | 11.9 | 24.5 | 1.05 | 3.38E-99    | 3.92E-100   |
| Cfd           | 6.6  | 13.7 | 1.05 | 2.99E-25    | 1.17E-25    |
| Jkamp         | 6.2  | 12.9 | 1.05 | 4.17E-35    | 1.24E-35    |
| Gypc          | 5.6  | 12   | 1.05 | 6.52E-53    | 1.35E-53    |
| C130074G19Rik | 5.8  | 11.9 | 1.05 | 8.35E-67    | 1.42E-67    |
| 2700094K13Rik | 5.4  | 11.1 | 1.05 | 8.68E-16    | 4.84E-16    |
| Tsen15        | 4.3  | 8.9  | 1.05 | 9.29E-21    | 4.23E-21    |
| Id2           | 4.1  | 8.4  | 1.05 | 5.98E-22    | 2.62E-22    |
| Irgm2         | 3.2  | 6.5  | 1.05 | 4.98E-46    | 1.16E-46    |
| 1190002N15Rik | 2.1  | 4.4  | 1.05 | 3.84E-35    | 1.15E-35    |
| Itga6         | 2.1  | 4.3  | 1.05 | 2.57E-51    | 5.45E-52    |
| Tusc3         | 1.6  | 3.3  | 1.05 | 2.20E-11    | 1.54E-11    |
| Vcam1         | 1.6  | 3.2  | 1.05 | 1.24E-22    | 5.33E-23    |
| Gm10408       | 1.1  | 2.2  | 1.05 | 4.57E-08    | 3.96E-08    |
| Wdr25         | 1    | 2.1  | 1.05 | 4.04E-12    | 2.70E-12    |
| Blnk          | 1    | 2.1  | 1.05 | 4.42E-10    | 3.34E-10    |
| Hist1h1e      | 0.8  | 1.7  | 1.05 | 0.000571148 | 0.000727546 |
| Ifih1         | 0.7  | 1.5  | 1.05 | 1.60E-12    | 1.05E-12    |
| Tdrp          | 0.7  | 1.5  | 1.05 | 1.25E-08    | 1.04E-08    |
| My112b        | 19.3 | 39.4 | 1.04 | 5.62E-70    | 9.20E-71    |
| Hsp90aa1      | 18.6 | 37.8 | 1.04 | 1.29E-206   | 7.07E-208   |
| Irf9          | 3.1  | 6.4  | 1.04 | 1.88E-30    | 6.39E-31    |
| Ggct          | 2.8  | 5.3  | 1.04 | 3.29E-12    | 2.19E-12    |
| Plat          | 1.1  | 2.3  | 1.04 | 8.49E-13    | 5.48E-13    |
| Apitd1        | 0.7  | 1.5  | 1.04 | 0.000413896 | 0.0005177   |
| Ccr2          | 0.7  | 1.4  | 1.04 | 7.73E-11    | 5.58E-11    |
| Itgam         | 0.5  | 1.1  | 1.04 | 4.21E-11    | 2.99E-11    |

|          |        |         |      |           |           |
|----------|--------|---------|------|-----------|-----------|
| St8sia4  | 0.6    | 1.1     | 1.04 | 8.86E-13  | 5.73E-13  |
| Tagln2   | 21.6   | 43.6    | 1.03 | 3.44E-113 | 3.49E-114 |
| Atpif1   | 21.1   | 42.9    | 1.03 | 3.38E-122 | 3.16E-123 |
| Ache     | 15     | 30.7    | 1.03 | 9.44E-128 | 8.54E-129 |
| Smim8    | 14.1   | 29.7    | 1.03 | 9.78E-44  | 2.41E-44  |
| Pdia6    | 12.2   | 24.7    | 1.03 | 6.93E-99  | 8.07E-100 |
| Pld2     | 4.5    | 9.3     | 1.03 | 3.16E-61  | 5.77E-62  |
| Zfand1   | 4.2    | 8.5     | 1.03 | 1.57E-27  | 5.74E-28  |
| Sri      | 3.2    | 6.6     | 1.03 | 1.10E-31  | 3.61E-32  |
| Nrarp    | 2.9    | 5.9     | 1.03 | 1.07E-29  | 3.70E-30  |
| Tmem106c | 2.6    | 5.3     | 1.03 | 5.23E-16  | 2.89E-16  |
| Fbln7    | 2.5    | 5       | 1.03 | 1.35E-28  | 4.82E-29  |
| Metrnl   | 2      | 4       | 1.03 | 3.92E-20  | 1.82E-20  |
| Tnfsf13  | 1.1    | 2.2     | 1.03 | 2.89E-08  | 2.48E-08  |
| Tnfaip6  | 0.7    | 1.4     | 1.03 | 1.36E-05  | 1.44E-05  |
| Gm13251  | 0.7    | 1.4     | 1.03 | 2.72E-11  | 1.91E-11  |
| Fndc4    | 0.7    | 1.3     | 1.03 | 4.62E-07  | 4.32E-07  |
| Snurf    | 0.6    | 1.3     | 1.03 | 5.30E-06  | 5.42E-06  |
| Tbxas1   | 0.5    | 1.1     | 1.03 | 2.23E-05  | 2.42E-05  |
| Crip1    | 45.7   | 91.8    | 1.02 | 2.00E-74  | 3.07E-75  |
| Cntfr    | 7.8    | 16.5    | 1.02 | 1.59E-62  | 2.84E-63  |
| Tmem141  | 7.6    | 16      | 1.02 | 2.87E-26  | 1.09E-26  |
| Nkain1   | 7.4    | 15      | 1.02 | 5.24E-71  | 8.43E-72  |
| Pdlim4   | 5.5    | 11      | 1.02 | 3.46E-25  | 1.36E-25  |
| Pfdn4    | 5.5    | 11      | 1.02 | 1.55E-17  | 7.99E-18  |
| Unc119   | 4.4    | 8.9     | 1.02 | 4.16E-20  | 1.94E-20  |
| Cav2     | 3.7    | 7.5     | 1.02 | 1.35E-38  | 3.72E-39  |
| Kbtbd13  | 3.5    | 7.1     | 1.02 | 7.42E-40  | 1.99E-40  |
| Anapc10  | 4      | 6.8     | 1.02 | 4.03E-16  | 2.21E-16  |
| Jam3     | 3.4    | 6.7     | 1.02 | 7.21E-26  | 2.76E-26  |
| Ankmy2   | 1.8    | 3.7     | 1.02 | 2.53E-18  | 1.26E-18  |
| Heyl     | 1.7    | 3.5     | 1.02 | 1.56E-30  | 5.27E-31  |
| Rsad2    | 1.6    | 3.1     | 1.02 | 3.17E-23  | 1.33E-23  |
| Sdc1     | 1.3    | 2.6     | 1.02 | 1.01E-15  | 5.65E-16  |
| Umps     | 1      | 2.1     | 1.02 | 6.15E-14  | 3.74E-14  |
| Drp2     | 0.9    | 1.8     | 1.02 | 2.62E-23  | 1.09E-23  |
| Naalad2  | 0.6    | 1.3     | 1.02 | 2.02E-09  | 1.59E-09  |
| Pvalb    | 6499.4 | 13157.7 | 1.01 | 0         | 0         |
| Col4a1   | 29.6   | 59.1    | 1.01 | 0         | 0         |
| Tmx2     | 16.5   | 33.9    | 1.01 | 2.42E-128 | 2.19E-129 |
| Emc9     | 14.5   | 29.2    | 1.01 | 6.00E-42  | 1.54E-42  |
| Dcakd    | 12.8   | 26.9    | 1.01 | 1.47E-87  | 1.94E-88  |
| Atp1b4   | 10.9   | 21.7    | 1.01 | 1.36E-158 | 9.95E-160 |
| Bcs1l    | 5.4    | 10.9    | 1.01 | 1.16E-37  | 3.27E-38  |
| Nrp1     | 4.5    | 8.9     | 1.01 | 4.49E-96  | 5.39E-97  |
| Sdc3     | 4      | 8.1     | 1.01 | 8.50E-72  | 1.35E-72  |
| Clqtnf5  | 2.9    | 6.1     | 1.01 | 9.24E-16  | 5.16E-16  |
| Antxr1   | 2.7    | 5.3     | 1.01 | 2.60E-52  | 5.46E-53  |
| Prrx2    | 1.6    | 3.2     | 1.01 | 3.27E-08  | 2.82E-08  |

|         |     |     |      |            |            |
|---------|-----|-----|------|------------|------------|
| Amhr2   | 1.5 | 2.9 | 1.01 | 1.59E-11   | 1.10E-11   |
| Arhgef9 | 1   | 2.2 | 1.01 | 3.06E-22   | 1.33E-22   |
| Ccnb2   | 1   | 2   | 1.01 | 5.90E-07   | 5.57E-07   |
| Ly6c2   | 0.9 | 1.9 | 1.01 | 0.00021237 | 0.00025608 |

---

**Table S2 Downregulated genes in Klf15KO muscles at Day 7 after CTX injection**

| Gene          | WT CTX D7<br>Average<br>FPKM | Klf15KO CTX D7<br>Average FPKM | log2<br>(Klf15KO/WTD7) | Qvalue (WT-vs-<br>Klf15KO) | Pvalue (WT-vs-<br>Klf15KO) |
|---------------|------------------------------|--------------------------------|------------------------|----------------------------|----------------------------|
| Serpina3m     | 1.1                          | 0                              | -6.38                  | 6.72E-21                   | 3.04E-21                   |
| Serpina3n     | 50.9                         | 1.1                            | -5.5                   | 0                          | 0                          |
| Doc2b         | 1.8                          | 0.1                            | -4.88                  | 2.19E-102                  | 2.45E-103                  |
| Fkbp5         | 60.4                         | 2.1                            | -4.82                  | 0                          | 0                          |
| Adhfe1        | 4.6                          | 0.2                            | -4.68                  | 2.53E-111                  | 2.62E-112                  |
| Hif3a         | 1.1                          | 0                              | -4.55                  | 5.64E-80                   | 8.03E-81                   |
| Bmp8a         | 1.2                          | 0.1                            | -4.53                  | 2.35E-32                   | 7.53E-33                   |
| Lvrn          | 1.4                          | 0.1                            | -4.42                  | 4.06E-67                   | 6.85E-68                   |
| Arrdc2        | 62.9                         | 3.8                            | -4.14                  | 0                          | 0                          |
| Lcn2          | 3.4                          | 0.2                            | -4.1                   | 2.03E-30                   | 6.90E-31                   |
| Gck           | 21.3                         | 1.3                            | -4.07                  | 0                          | 0                          |
| Cyp2e1        | 2.4                          | 0.2                            | -3.98                  | 1.39E-43                   | 3.44E-44                   |
| Fam107a       | 2.6                          | 0.2                            | -3.97                  | 3.42E-83                   | 4.72E-84                   |
| Prodh         | 8.5                          | 0.6                            | -3.81                  | 1.60E-187                  | 9.74E-189                  |
| Angptl7       | 19.9                         | 1.5                            | -3.73                  | 0                          | 0                          |
| Acot1         | 1.9                          | 0.2                            | -3.52                  | 5.64E-29                   | 1.99E-29                   |
| Cebpd         | 75.9                         | 6.9                            | -3.45                  | 0                          | 0                          |
| Slc10a6       | 3.8                          | 0.4                            | -3.45                  | 1.01E-64                   | 1.77E-65                   |
| Card14        | 2.4                          | 0.2                            | -3.34                  | 2.62E-81                   | 3.66E-82                   |
| Bpifb1        | 1                            | 0.1                            | -3.29                  | 1.50E-15                   | 8.47E-16                   |
| Il6ra         | 4.3                          | 0.5                            | -3.22                  | 6.33E-124                  | 5.85E-125                  |
| Mt2           | 626                          | 70.8                           | -3.14                  | 0                          | 0                          |
| Slco4a1       | 1.7                          | 0.2                            | -3.14                  | 1.95E-33                   | 6.08E-34                   |
| Rnase13       | 3.1                          | 0.4                            | -3.08                  | 4.76E-33                   | 1.50E-33                   |
| Gabrr2        | 7.2                          | 0.9                            | -3.04                  | 4.99E-107                  | 5.42E-108                  |
| BC048679      | 1.8                          | 0.2                            | -3                     | 8.41E-11                   | 6.08E-11                   |
| Cth           | 1.2                          | 0.2                            | -2.94                  | 9.12E-18                   | 4.66E-18                   |
| Fmo2          | 11.2                         | 1.5                            | -2.93                  | 0                          | 0                          |
| Map3k6        | 5                            | 0.6                            | -2.87                  | 3.16E-170                  | 2.17E-171                  |
| Scgb3a1       | 1                            | 0.2                            | -2.75                  | 1.27E-05                   | 1.35E-05                   |
| Inmt          | 3.8                          | 0.6                            | -2.74                  | 6.74E-29                   | 2.39E-29                   |
| Prom1         | 2.2                          | 0.3                            | -2.74                  | 3.55E-55                   | 7.10E-56                   |
| Chac1         | 39.2                         | 6                              | -2.72                  | 0                          | 0                          |
| Mt1           | 494.4                        | 76.4                           | -2.69                  | 0                          | 0                          |
| Fbxo32        | 93.1                         | 14.7                           | -2.68                  | 0                          | 0                          |
| Cep851        | 5.1                          | 0.7                            | -2.67                  | 5.77E-152                  | 4.37E-153                  |
| Trim63        | 327.1                        | 51.7                           | -2.66                  | 0                          | 0                          |
| Ddit4         | 42.1                         | 6.6                            | -2.66                  | 0                          | 0                          |
| Cldn15        | 6.4                          | 1                              | -2.66                  | 1.24E-85                   | 1.68E-86                   |
| 8430408G22Rik | 28.9                         | 4.6                            | -2.65                  | 2.09E-264                  | 9.35E-266                  |
| S100a8        | 4                            | 0.6                            | -2.65                  | 1.38E-11                   | 9.49E-12                   |
| Spock2        | 5.6                          | 0.9                            | -2.62                  | 1.34E-191                  | 7.98E-193                  |

|               |       |      |       |           |           |
|---------------|-------|------|-------|-----------|-----------|
| Aldh1a1       | 54.1  | 9.2  | -2.58 | 0         | 0         |
| Rtn4rl2       | 1     | 0.2  | -2.55 | 1.09E-14  | 6.38E-15  |
| Per1          | 36.4  | 6.4  | -2.5  | 0         | 0         |
| Plin5         | 12.3  | 2.2  | -2.5  | 1.65E-155 | 1.23E-156 |
| Myoc          | 11    | 2    | -2.5  | 1.22E-152 | 9.16E-154 |
| Tac4          | 1.9   | 0.3  | -2.45 | 4.70E-16  | 2.58E-16  |
| Gm29801       | 1.2   | 0.2  | -2.43 | 3.60E-19  | 1.73E-19  |
| Tppp2         | 1.9   | 0.4  | -2.41 | 6.11E-10  | 4.66E-10  |
| Maff          | 5.7   | 1.1  | -2.39 | 7.12E-66  | 1.22E-66  |
| Gnmt          | 1.4   | 0.3  | -2.39 | 2.41E-10  | 1.79E-10  |
| Rasd1         | 2.7   | 0.5  | -2.38 | 5.64E-28  | 2.04E-28  |
| E130012A19Rik | 1.4   | 0.3  | -2.38 | 1.22E-21  | 5.38E-22  |
| Stc1          | 1.7   | 0.3  | -2.36 | 3.15E-40  | 8.36E-41  |
| Plin4         | 67.9  | 13.8 | -2.32 | 0         | 0         |
| Fbp2          | 24.8  | 5.3  | -2.25 | 2.51E-185 | 1.54E-186 |
| Acss1         | 8.5   | 1.8  | -2.23 | 7.81E-178 | 5.04E-179 |
| Syt12         | 7.1   | 1.5  | -2.21 | 1.22E-133 | 1.06E-134 |
| Capn11        | 1.6   | 0.4  | -2.2  | 1.79E-21  | 7.97E-22  |
| Glul          | 366.5 | 80.1 | -2.19 | 0         | 0         |
| Fam134b       | 147.3 | 32.6 | -2.19 | 0         | 0         |
| Cish          | 4.1   | 1    | -2.16 | 5.42E-71  | 8.74E-72  |
| Ibsp          | 3.4   | 0.8  | -2.15 | 2.02E-37  | 5.75E-38  |
| Inhbb         | 1.2   | 0.3  | -2.15 | 2.48E-29  | 8.64E-30  |
| Tmem252       | 11.2  | 2.5  | -2.14 | 1.62E-151 | 1.23E-152 |
| Pik3r1        | 16.5  | 4    | -2.13 | 0         | 0         |
| Kenk5         | 1.3   | 0.3  | -2.13 | 8.43E-26  | 3.24E-26  |
| Tfdp2         | 21.8  | 5.2  | -2.12 | 0         | 0         |
| Sorbs1        | 68    | 16.3 | -2.11 | 0         | 0         |
| Cdhr3         | 2.6   | 0.7  | -2.11 | 6.52E-40  | 1.74E-40  |
| Gm7160        | 2.7   | 0.6  | -2.1  | 3.53E-08  | 3.04E-08  |
| 1700066C05Rik | 3.9   | 0.9  | -2.09 | 4.46E-09  | 3.60E-09  |
| Dpep1         | 8.3   | 2    | -2.08 | 8.66E-97  | 1.03E-97  |
| Fzd4          | 7.3   | 1.8  | -2.08 | 9.02E-144 | 7.32E-145 |
| Ppp1r15a      | 43.1  | 10.2 | -2.07 | 0         | 0         |
| Scara5        | 4.2   | 1    | -2.07 | 2.26E-85  | 3.05E-86  |
| Pdk4          | 152.7 | 37.5 | -2.05 | 0         | 0         |
| Clec4d        | 2.4   | 0.6  | -2.05 | 1.63E-17  | 8.40E-18  |
| Wisp2         | 2.1   | 0.5  | -2.01 | 5.06E-20  | 2.36E-20  |
| Irs2          | 3.3   | 0.8  | -2    | 7.35E-69  | 1.22E-69  |
| Mmp13         | 15.2  | 3.8  | -1.99 | 1.16E-202 | 6.50E-204 |
| Klk1b26       | 5.8   | 1.5  | -1.98 | 4.12E-27  | 1.52E-27  |
| Car4          | 13.2  | 3.4  | -1.97 | 3.18E-85  | 4.31E-86  |
| Tango2        | 24.5  | 5.6  | -1.96 | 2.38E-202 | 1.35E-203 |
| Npc1          | 19.6  | 5.2  | -1.93 | 0         | 0         |
| Ednrb         | 8.2   | 2.3  | -1.93 | 5.44E-149 | 4.19E-150 |
| Cyp26b1       | 2     | 0.5  | -1.93 | 2.32E-46  | 5.39E-47  |
| Iqck          | 1.1   | 0.3  | -1.93 | 4.01E-12  | 2.68E-12  |
| Slc43a1       | 10.3  | 2.5  | -1.91 | 6.62E-130 | 5.92E-131 |
| Fxyd2         | 7.3   | 2    | -1.88 | 8.97E-20  | 4.23E-20  |



|           |       |       |       |             |             |
|-----------|-------|-------|-------|-------------|-------------|
| Usp54     | 5.9   | 1.5   | -1.85 | 7.69E-160   | 5.59E-161   |
| Apod      | 58.6  | 16.4  | -1.84 | 0           | 0           |
| Jade2     | 1.7   | 0.5   | -1.83 | 6.92E-47    | 1.59E-47    |
| Zdhhc23   | 1.5   | 0.4   | -1.83 | 3.04E-39    | 8.27E-40    |
| Gm826     | 1.5   | 0.4   | -1.83 | 1.93E-07    | 1.75E-07    |
| Cd163     | 2     | 0.6   | -1.82 | 9.31E-39    | 2.57E-39    |
| Igfbp3    | 30.9  | 8.8   | -1.8  | 0           | 0           |
| Vegfd     | 7.1   | 2     | -1.8  | 1.69E-57    | 3.26E-58    |
| Pnpla2    | 372.5 | 107.6 | -1.79 | 0           | 0           |
| Ppp1r1a   | 12.5  | 3.7   | -1.79 | 2.79E-70    | 4.53E-71    |
| Pnpla3    | 8.8   | 2.6   | -1.79 | 8.77E-173   | 5.92E-174   |
| Ehd3      | 5.8   | 1.7   | -1.78 | 1.18E-92    | 1.48E-93    |
| Tmem82    | 2.3   | 0.7   | -1.78 | 6.75E-22    | 2.96E-22    |
| Net1      | 39.8  | 11.6  | -1.77 | 0           | 0           |
| Slc25a34  | 6.4   | 1.9   | -1.77 | 5.25E-75    | 8.02E-76    |
| Fam209    | 1.1   | 0.3   | -1.77 | 0.000170043 | 0.000203181 |
| Galnt15   | 7.3   | 2.2   | -1.75 | 2.17E-206   | 1.20E-207   |
| Foxred2   | 1.4   | 0.4   | -1.74 | 1.62E-33    | 5.05E-34    |
| Nfil3     | 36.6  | 10.8  | -1.73 | 4.28E-296   | 1.78E-297   |
| Apoc2     | 4     | 1.2   | -1.73 | 6.89E-11    | 4.96E-11    |
| Eif4ebp1  | 158.7 | 48.1  | -1.72 | 0           | 0           |
| Rasd2     | 3.4   | 1     | -1.72 | 3.55E-40    | 9.42E-41    |
| Atoh8     | 10.6  | 3.2   | -1.71 | 8.40E-102   | 9.46E-103   |
| Gda       | 4.6   | 1.4   | -1.7  | 2.39E-96    | 2.86E-97    |
| Xdh       | 12.4  | 4.1   | -1.69 | 7.64E-173   | 5.14E-174   |
| Lnx1      | 1.2   | 0.4   | -1.69 | 2.76E-14    | 1.66E-14    |
| Ctxn3     | 39.4  | 12.3  | -1.68 | 6.80E-213   | 3.64E-214   |
| Cpm       | 1     | 0.3   | -1.68 | 1.65E-21    | 7.33E-22    |
| Kcnj12    | 22.2  | 7.1   | -1.66 | 0           | 0           |
| Slc39a14  | 7.9   | 2.6   | -1.66 | 3.02E-142   | 2.48E-143   |
| Gramd3    | 4.9   | 1.6   | -1.66 | 6.42E-51    | 1.37E-51    |
| Arntl     | 11.1  | 3.6   | -1.65 | 7.22E-125   | 6.64E-126   |
| Acer2     | 4.1   | 2.2   | -1.65 | 1.87E-39    | 5.06E-40    |
| Hsd17b14  | 1.4   | 0.5   | -1.65 | 2.89E-07    | 2.66E-07    |
| Slc38a2   | 88.4  | 28.2  | -1.64 | 0           | 0           |
| Csrnp1    | 3.7   | 1.2   | -1.64 | 2.65E-43    | 6.58E-44    |
| Fas       | 3.5   | 1.1   | -1.64 | 5.58E-21    | 2.52E-21    |
| Sema3g    | 3.2   | 1     | -1.64 | 3.22E-55    | 6.44E-56    |
| Pim3      | 24.9  | 8     | -1.63 | 4.47E-229   | 2.26E-230   |
| Selenbp1  | 4.7   | 1.5   | -1.63 | 5.37E-31    | 1.80E-31    |
| Nr2c2     | 1.9   | 0.6   | -1.63 | 1.36E-55    | 2.68E-56    |
| Edn1      | 1     | 0.3   | -1.63 | 9.31E-10    | 7.19E-10    |
| Fbxo31    | 69.6  | 22.7  | -1.62 | 0           | 0           |
| Mcf2l     | 6.8   | 2.2   | -1.62 | 4.03E-135   | 3.46E-136   |
| Trp53inp1 | 9.4   | 3.1   | -1.61 | 1.69E-189   | 1.02E-190   |
| Gm40814   | 2.9   | 0.9   | -1.61 | 5.75E-29    | 2.03E-29    |
| Llgl2     | 1.7   | 0.6   | -1.6  | 1.76E-23    | 7.32E-24    |
| Aldh6a1   | 28.5  | 9.5   | -1.59 | 0           | 0           |
| Filip1    | 27.6  | 9.5   | -1.58 | 0           | 0           |

|         |       |      |       |           |           |
|---------|-------|------|-------|-----------|-----------|
| Cnksr1  | 122.9 | 42.7 | -1.57 | 0         | 0         |
| Foxo1   | 11.7  | 3.9  | -1.57 | 8.74E-234 | 4.33E-235 |
| Tbx6    | 3.5   | 1.2  | -1.57 | 3.68E-23  | 1.55E-23  |
| Prima1  | 1.5   | 0.6  | -1.57 | 4.50E-21  | 2.02E-21  |
| Shd     | 1.1   | 0.4  | -1.57 | 3.78E-08  | 3.26E-08  |
| Dusp26  | 28.5  | 10   | -1.56 | 1.14E-178 | 7.32E-180 |
| Crybb3  | 4.6   | 2    | -1.56 | 6.07E-24  | 2.49E-24  |
| Tmc7    | 3.5   | 1.2  | -1.56 | 2.95E-58  | 5.61E-59  |
| Lrrc52  | 2.1   | 0.7  | -1.56 | 3.10E-10  | 2.31E-10  |
| Tacc2   | 277.2 | 98.7 | -1.55 | 0         | 0         |
| Rora    | 12.4  | 4.7  | -1.55 | 0         | 0         |
| Slc43a3 | 19    | 6.4  | -1.54 | 4.64E-160 | 3.35E-161 |
| Hrct1   | 4.7   | 1.6  | -1.54 | 2.55E-16  | 1.39E-16  |
| Rbm15   | 4.1   | 1.4  | -1.53 | 2.54E-47  | 5.82E-48  |
| Tob2    | 44.1  | 15.3 | -1.52 | 0         | 0         |
| Wdr62   | 1.7   | 0.6  | -1.52 | 7.70E-30  | 2.65E-30  |
| Retnla  | 7.4   | 2.6  | -1.51 | 1.07E-15  | 6.02E-16  |
| Diras1  | 1.4   | 0.5  | -1.51 | 3.03E-15  | 1.74E-15  |
| Mss51   | 68.6  | 24.6 | -1.49 | 0         | 0         |
| Spsb1   | 10.5  | 3.7  | -1.49 | 3.27E-108 | 3.52E-109 |
| Arl5c   | 4.6   | 1.5  | -1.49 | 5.76E-23  | 2.44E-23  |
| Hook1   | 2.6   | 0.9  | -1.49 | 5.25E-37  | 1.51E-37  |
| Acot2   | 13.1  | 4.7  | -1.48 | 4.72E-96  | 5.68E-97  |
| Ankrd9  | 146.1 | 52.6 | -1.47 | 0         | 0         |
| Flt1    | 7.3   | 2.7  | -1.46 | 5.57E-149 | 4.30E-150 |
| Duxbl1  | 1.1   | 0.4  | -1.46 | 3.42E-09  | 2.73E-09  |
| Art3    | 167.4 | 62.1 | -1.45 | 0         | 0         |
| Ppp1r3c | 163.7 | 59.3 | -1.45 | 0         | 0         |
| Kyat3   | 5.6   | 2.1  | -1.45 | 3.44E-39  | 9.37E-40  |
| Tns1    | 68.4  | 25.5 | -1.44 | 0         | 0         |
| Mocs1   | 16.4  | 6.4  | -1.44 | 9.31E-124 | 8.61E-125 |
| Rilpl1  | 118.6 | 44.1 | -1.43 | 0         | 0         |
| Rbl2    | 11.5  | 4.3  | -1.43 | 3.41E-176 | 2.22E-177 |
| Anxa8   | 1.2   | 0.5  | -1.42 | 1.30E-08  | 1.08E-08  |
| Tsc22d3 | 111.4 | 40.9 | -1.41 | 0         | 0         |
| Sesn1   | 23.7  | 9    | -1.41 | 2.98E-195 | 1.77E-196 |
| Zbtb16  | 28.2  | 10.6 | -1.4  | 0         | 0         |
| Usp53   | 4.5   | 1.7  | -1.4  | 5.87E-84  | 8.05E-85  |
| Klf9    | 68.5  | 26.2 | -1.39 | 0         | 0         |
| Mafk    | 16.2  | 6.2  | -1.38 | 1.39E-137 | 1.18E-138 |
| Nr4a3   | 5.2   | 2    | -1.38 | 2.83E-87  | 3.75E-88  |
| Rps6ka5 | 3.5   | 1.3  | -1.38 | 8.94E-43  | 2.25E-43  |
| Socs3   | 4.9   | 1.9  | -1.37 | 3.22E-41  | 8.41E-42  |
| Rnf125  | 4.7   | 1.8  | -1.37 | 9.66E-76  | 1.46E-76  |
| Agfg2   | 3.1   | 1.2  | -1.37 | 1.71E-28  | 6.14E-29  |
| Ern1    | 1.8   | 0.7  | -1.37 | 2.04E-22  | 8.80E-23  |
| Ube4a   | 10.5  | 4.1  | -1.36 | 1.67E-185 | 1.02E-186 |
| Cp      | 1.8   | 0.7  | -1.36 | 9.06E-26  | 3.49E-26  |
| Elk4    | 1.3   | 0.5  | -1.36 | 8.98E-18  | 4.58E-18  |

|               |      |      |       |             |             |
|---------------|------|------|-------|-------------|-------------|
| Ttl17         | 13.6 | 5.4  | -1.35 | 3.95E-287   | 1.69E-288   |
| Fasn          | 4.1  | 1.6  | -1.35 | 2.13E-118   | 2.06E-119   |
| Zbtb8b        | 1.7  | 0.7  | -1.35 | 3.66E-23    | 1.54E-23    |
| Dusp4         | 1.4  | 0.6  | -1.35 | 3.41E-11    | 2.41E-11    |
| Cited2        | 77   | 30.5 | -1.34 | 0           | 0           |
| Wbp11         | 37.8 | 14.9 | -1.34 | 0           | 0           |
| Tns2          | 18.3 | 7.2  | -1.34 | 5.76E-241   | 2.76E-242   |
| Slc15a4       | 10.8 | 4.4  | -1.34 | 4.29E-81    | 6.05E-82    |
| Map3k8        | 2    | 0.8  | -1.34 | 2.48E-13    | 1.56E-13    |
| 1700067K01Rik | 1.1  | 0.4  | -1.34 | 5.48E-06    | 5.61E-06    |
| 1700109H08Rik | 7.2  | 2.9  | -1.33 | 8.00E-16    | 4.45E-16    |
| Slit3         | 1.2  | 0.5  | -1.33 | 2.45E-18    | 1.22E-18    |
| Hectd1        | 35.4 | 14.1 | -1.32 | 0           | 0           |
| Lrg1          | 11.8 | 4.7  | -1.32 | 8.28E-46    | 1.94E-46    |
| Zbed5         | 64.5 | 24.4 | -1.31 | 3.59E-81    | 5.03E-82    |
| Art5          | 31.5 | 13   | -1.31 | 4.64E-147   | 3.64E-148   |
| Rhbdf2        | 16.1 | 6.7  | -1.31 | 4.92E-140   | 4.11E-141   |
| Cblb          | 6    | 2.4  | -1.31 | 2.42E-108   | 2.60E-109   |
| Gm11100       | 4.5  | 1.8  | -1.31 | 2.82E-08    | 2.41E-08    |
| Penk          | 3.9  | 1.6  | -1.31 | 1.41E-16    | 7.57E-17    |
| Igfn1         | 34.5 | 15.8 | -1.3  | 0           | 0           |
| Nrbp2         | 31.3 | 12.8 | -1.3  | 1.24E-227   | 6.27E-229   |
| Tmem100       | 9.1  | 3.6  | -1.3  | 1.41E-37    | 3.99E-38    |
| Synj2         | 20.2 | 8.2  | -1.29 | 1.54E-302   | 6.28E-304   |
| Klhl38        | 13.4 | 5.6  | -1.29 | 2.32E-80    | 3.30E-81    |
| Zfyve1        | 11.2 | 4.9  | -1.28 | 5.57E-106   | 6.08E-107   |
| Ddi2          | 5.7  | 2.4  | -1.28 | 1.38E-54    | 2.77E-55    |
| Gfpt2         | 2.8  | 1.2  | -1.28 | 9.51E-24    | 3.93E-24    |
| Abcb1b        | 1.5  | 0.6  | -1.28 | 9.70E-19    | 4.74E-19    |
| Snai3         | 16.9 | 7    | -1.27 | 6.17E-71    | 9.97E-72    |
| Lrrc58        | 11.3 | 4.6  | -1.27 | 1.28E-255   | 5.89E-257   |
| Fam117b       | 2.9  | 1.2  | -1.27 | 5.48E-43    | 1.37E-43    |
| Gucd1         | 32.1 | 13.5 | -1.26 | 1.09E-237   | 5.35E-239   |
| Rorc          | 28.3 | 12.9 | -1.26 | 6.64E-167   | 4.60E-168   |
| Ctgf          | 12.4 | 5.1  | -1.26 | 4.98E-78    | 7.25E-79    |
| Glt28d2       | 5.8  | 2.4  | -1.25 | 1.54E-41    | 3.98E-42    |
| Pygo1         | 3    | 1.3  | -1.25 | 8.60E-15    | 5.03E-15    |
| 1110017D15Rik | 1    | 0.7  | -1.25 | 0.000386917 | 0.000481662 |
| Ccdc6         | 29.5 | 12.7 | -1.24 | 0           | 0           |
| Sh3rf2        | 7.8  | 3.4  | -1.24 | 3.95E-94    | 4.85E-95    |
| Sbsn          | 3.4  | 1.5  | -1.24 | 3.85E-15    | 2.21E-15    |
| Spidr         | 1.2  | 0.5  | -1.24 | 7.80E-11    | 5.63E-11    |
| Cebpb         | 99.4 | 42.4 | -1.23 | 0           | 0           |
| Ank3          | 35.8 | 15.7 | -1.23 | 0           | 0           |
| Ldlrad3       | 10.2 | 4.3  | -1.23 | 8.64E-98    | 1.01E-98    |
| Npr3          | 3.3  | 1.4  | -1.23 | 7.14E-55    | 1.43E-55    |
| Sorbs3        | 48   | 23.2 | -1.22 | 2.66E-283   | 1.17E-284   |
| Fbxl20        | 6.3  | 2.7  | -1.22 | 3.84E-131   | 3.38E-132   |
| Ucn2          | 3    | 1.3  | -1.22 | 1.33E-08    | 1.11E-08    |

|               |        |       |       |             |             |
|---------------|--------|-------|-------|-------------|-------------|
| Gsn           | 113.7  | 49.5  | -1.21 | 0           | 0           |
| Asb11         | 85.8   | 37.8  | -1.21 | 0           | 0           |
| Mn1           | 16.7   | 7.3   | -1.21 | 5.83E-249   | 2.69E-250   |
| Ccdc57        | 7.8    | 3.4   | -1.21 | 2.92E-57    | 5.64E-58    |
| Adam8         | 4.3    | 1.8   | -1.21 | 3.69E-34    | 1.13E-34    |
| Ms4a4d        | 2.7    | 1.2   | -1.21 | 3.84E-11    | 2.72E-11    |
| Asic3         | 2.2    | 0.9   | -1.21 | 1.20E-25    | 4.65E-26    |
| Dnm3          | 1.4    | 0.7   | -1.21 | 8.04E-17    | 4.26E-17    |
| Cd36          | 65.1   | 27.9  | -1.2  | 0           | 0           |
| Slc6a6        | 32.9   | 14.3  | -1.2  | 0           | 0           |
| Acvr1b        | 11.8   | 5.2   | -1.2  | 1.45E-93    | 1.80E-94    |
| Ubc           | 752.6  | 330.1 | -1.19 | 0           | 0           |
| Rhou          | 6.1    | 2.7   | -1.19 | 2.59E-49    | 5.70E-50    |
| Kcnc3         | 3      | 1.3   | -1.19 | 5.11E-42    | 1.31E-42    |
| Spns2         | 11.9   | 5.5   | -1.18 | 2.37E-88    | 3.09E-89    |
| Abca7         | 6      | 2.7   | -1.18 | 3.87E-89    | 5.01E-90    |
| Slc6a9        | 4.1    | 1.8   | -1.18 | 8.36E-32    | 2.72E-32    |
| Itgb11        | 3.8    | 1.7   | -1.18 | 4.57E-22    | 1.99E-22    |
| Mmp3          | 2.5    | 1.1   | -1.18 | 7.28E-12    | 4.94E-12    |
| Cntf          | 2.1    | 0.9   | -1.18 | 3.20E-07    | 2.95E-07    |
| 4933415F23Rik | 1.5    | 0.7   | -1.18 | 1.21E-07    | 1.08E-07    |
| Fam124a       | 1.4    | 0.6   | -1.18 | 1.03E-12    | 6.71E-13    |
| Serinc3       | 130.8  | 57.7  | -1.17 | 0           | 0           |
| Gpx3          | 310.7  | 137.8 | -1.16 | 0           | 0           |
| Ipo13         | 110.5  | 49.6  | -1.16 | 0           | 0           |
| Dgat2         | 15.3   | 6.9   | -1.16 | 4.01E-79    | 5.75E-80    |
| Osgin1        | 10     | 4.4   | -1.16 | 8.06E-46    | 1.89E-46    |
| Foxk1         | 5.6    | 2.6   | -1.16 | 8.83E-94    | 1.09E-94    |
| Crebrf        | 3.5    | 1.6   | -1.16 | 8.79E-61    | 1.62E-61    |
| Armcx5        | 3.5    | 1.5   | -1.16 | 1.94E-23    | 8.09E-24    |
| Nfxl1         | 1.9    | 0.9   | -1.16 | 2.53E-17    | 1.31E-17    |
| Slpi          | 1.3    | 0.6   | -1.16 | 0.000391799 | 0.000488275 |
| Ifitm1        | 2.8    | 1.3   | -1.15 | 2.31E-05    | 2.51E-05    |
| Aoc2          | 1.5    | 0.7   | -1.15 | 8.34E-11    | 6.03E-11    |
| Lmod2         | 370.2  | 166.7 | -1.14 | 0           | 0           |
| Cry2          | 15.7   | 7.1   | -1.14 | 7.64E-141   | 6.33E-142   |
| Col7a1        | 8.1    | 3.6   | -1.14 | 2.96E-166   | 2.06E-167   |
| Msc           | 4      | 1.9   | -1.14 | 2.44E-17    | 1.26E-17    |
| Acadl         | 304.9  | 138.7 | -1.13 | 0           | 0           |
| Rere          | 25.9   | 11.7  | -1.13 | 0           | 0           |
| Trpv4         | 1.2    | 0.5   | -1.13 | 9.83E-10    | 7.60E-10    |
| Ybx3          | 1247.1 | 578.9 | -1.12 | 0           | 0           |
| Pnrc1         | 112    | 51.4  | -1.12 | 0           | 0           |
| Dusp1         | 69.6   | 31.9  | -1.12 | 2.29E-289   | 9.70E-291   |
| Ulk1          | 26.6   | 12.7  | -1.12 | 3.53E-279   | 1.56E-280   |
| Pde4d         | 25.9   | 11.4  | -1.12 | 0           | 0           |
| Pim1          | 23.7   | 10.8  | -1.12 | 3.03E-89    | 3.92E-90    |
| Olf1033       | 13     | 5.9   | -1.12 | 1.40E-74    | 2.15E-75    |
| Smyd2         | 250.4  | 117.9 | -1.11 | 0           | 0           |

|               |       |       |       |           |           |
|---------------|-------|-------|-------|-----------|-----------|
| Anxa11        | 131.6 | 60.9  | -1.11 | 0         | 0         |
| Oat           | 82.2  | 38.2  | -1.11 | 0         | 0         |
| Tpbgl         | 54.2  | 25.3  | -1.11 | 0         | 0         |
| Mlycd         | 48.1  | 22.9  | -1.11 | 1.02E-213 | 5.45E-215 |
| Sec24a        | 6.6   | 3.2   | -1.11 | 1.76E-90  | 2.25E-91  |
| Zfp966        | 2.1   | 1     | -1.11 | 1.46E-10  | 1.07E-10  |
| Zfp967        | 2.1   | 1     | -1.11 | 1.67E-10  | 1.23E-10  |
| Dfna5         | 1.3   | 0.6   | -1.11 | 1.31E-07  | 1.18E-07  |
| Pde4dip       | 364.1 | 171.4 | -1.1  | 0         | 0         |
| Tmem52        | 221.9 | 104   | -1.1  | 0         | 0         |
| Gm39972       | 18.4  | 8.2   | -1.1  | 2.66E-73  | 4.14E-74  |
| Hipk1         | 8.1   | 3.8   | -1.1  | 1.64E-131 | 1.44E-132 |
| Ifi205        | 6.4   | 2.9   | -1.1  | 1.21E-22  | 5.19E-23  |
| Zrsr1         | 4.5   | 2.1   | -1.1  | 3.02E-43  | 7.50E-44  |
| Chil1         | 1.8   | 0.8   | -1.1  | 1.11E-07  | 9.89E-08  |
| Arhgap36      | 1.3   | 0.6   | -1.1  | 3.44E-09  | 2.75E-09  |
| Egln3         | 47    | 21.9  | -1.09 | 1.18E-257 | 5.38E-259 |
| Idh1          | 20.5  | 9.6   | -1.09 | 7.25E-96  | 8.75E-97  |
| D230025D16Rik | 13.5  | 6.4   | -1.09 | 3.86E-81  | 5.42E-82  |
| Cdc14a        | 7.8   | 3.5   | -1.09 | 2.26E-68  | 3.78E-69  |
| Jmy           | 5.1   | 2.4   | -1.09 | 7.00E-94  | 8.63E-95  |
| Hoga1         | 3.4   | 1.6   | -1.09 | 1.04E-12  | 6.73E-13  |
| Ppara         | 3.3   | 1.5   | -1.09 | 9.32E-51  | 2.00E-51  |
| Pdim5         | 434.7 | 207.3 | -1.08 | 0         | 0         |
| Ctsl          | 133   | 62.5  | -1.08 | 0         | 0         |
| St3gal5       | 53.9  | 25.9  | -1.08 | 1.50E-242 | 7.13E-244 |
| Nfkbia        | 45.1  | 21.2  | -1.08 | 4.97E-144 | 4.01E-145 |
| Klf15         | 34    | 15.8  | -1.08 | 4.48E-171 | 3.06E-172 |
| Zkscan17      | 11.6  | 5.5   | -1.08 | 8.66E-88  | 1.14E-88  |
| Dusp7         | 9.4   | 4.4   | -1.08 | 1.13E-62  | 2.02E-63  |
| Arl4a         | 7     | 3.3   | -1.08 | 4.11E-53  | 8.47E-54  |
| Smcr8         | 5     | 2.4   | -1.08 | 2.62E-76  | 3.90E-77  |
| Gpr19         | 2.6   | 1     | -1.08 | 1.65E-11  | 1.14E-11  |
| Bnip3         | 144   | 68.6  | -1.07 | 0         | 0         |
| Lrrc30        | 98.4  | 46.4  | -1.07 | 0         | 0         |
| Nos1          | 16.2  | 7.8   | -1.07 | 0         | 0         |
| Spen          | 4.6   | 2.2   | -1.07 | 1.40E-114 | 1.40E-115 |
| Lpin1         | 52.8  | 25.6  | -1.06 | 0         | 0         |
| Klf13         | 14.6  | 7     | -1.06 | 2.86E-185 | 1.76E-186 |
| Clk2-scamp3   | 5.6   | 2.7   | -1.06 | 2.69E-33  | 8.41E-34  |
| Mbp           | 2.7   | 1.2   | -1.06 | 1.82E-14  | 1.08E-14  |
| Car15         | 2.1   | 1     | -1.06 | 1.68E-06  | 1.65E-06  |
| Abcb1a        | 1.8   | 0.9   | -1.06 | 8.58E-19  | 4.18E-19  |
| Mylk2         | 352.5 | 183.3 | -1.05 | 0         | 0         |
| Tmem38b       | 46.9  | 22.6  | -1.05 | 3.48E-258 | 1.58E-259 |
| Ocl           | 6.1   | 3     | -1.05 | 9.05E-64  | 1.60E-64  |
| Nova1         | 2     | 1.1   | -1.05 | 2.16E-14  | 1.29E-14  |
| Zfp189        | 1.6   | 0.8   | -1.05 | 1.72E-10  | 1.27E-10  |
| Tmem198       | 1.1   | 0.5   | -1.05 | 5.31E-06  | 5.43E-06  |

|               |      |      |       |           |           |
|---------------|------|------|-------|-----------|-----------|
| Psme4         | 41.8 | 20.4 | -1.04 | 0         | 0         |
| Osmr          | 4.3  | 2    | -1.04 | 8.20E-39  | 2.26E-39  |
| Zfp646        | 3.1  | 1.5  | -1.04 | 1.44E-38  | 3.98E-39  |
| Kcna5         | 2.9  | 1.4  | -1.04 | 4.21E-18  | 2.12E-18  |
| Avil          | 2.6  | 1.3  | -1.04 | 6.17E-17  | 3.26E-17  |
| Adgrf5        | 13.1 | 7.4  | -1.03 | 1.21E-205 | 6.76E-207 |
| Cbx7          | 8.9  | 4.4  | -1.03 | 6.48E-51  | 1.39E-51  |
| Bmp6          | 4    | 2    | -1.03 | 8.28E-24  | 3.41E-24  |
| Fdft1         | 21.6 | 10.7 | -1.02 | 1.03E-148 | 7.94E-150 |
| Gm10705       | 18.7 | 9.2  | -1.02 | 3.69E-24  | 1.50E-24  |
| 4931406P16Rik | 10.4 | 5.1  | -1.02 | 5.73E-115 | 5.72E-116 |
| Foxo3         | 8.4  | 4.1  | -1.02 | 6.41E-107 | 6.98E-108 |
| Slc2a1        | 6.9  | 3.4  | -1.02 | 9.24E-34  | 2.86E-34  |
| LOC102634078  | 5    | 2.5  | -1.02 | 2.98E-20  | 1.38E-20  |
| Vldlr         | 29.6 | 15   | -1.01 | 0         | 0         |
| Fam63a        | 28.6 | 16.7 | -1.01 | 1.06E-124 | 9.76E-126 |
| Alpk2         | 22.6 | 11.1 | -1.01 | 1.93E-300 | 7.94E-302 |
| Ece1          | 17.3 | 8.5  | -1.01 | 8.10E-151 | 6.21E-152 |
| Lgals4        | 6.4  | 3.2  | -1.01 | 6.27E-21  | 2.83E-21  |

---

**Table S3 Oligonucleotides**

| <b>Gene</b>        | <b>Application</b> | <b>Forward Sequence (5'- 3')</b> | <b>Reverse Sequence (5'- 3')</b> |
|--------------------|--------------------|----------------------------------|----------------------------------|
| <i>Klf15</i>       | qRT-PCR            | GTCAACATCCAGGGGCAGACCTT          | TTGGCGGCAATGGGCACAG              |
| <i>Myog</i>        | qRT-PCR            | CAGCCCAGCGAGGGAATTA              | AGAAGCTCCTGAGTTTGCC              |
| <i>Ckm</i>         | qRT-PCR            | GGCAACACCCACAACAAGTTC            | CCTTGAAGACCGTGTAGGACT            |
| <i>Pax7</i>        | qRT-PCR            | GAATCAGAACCCGACCTCCC             | CGCCGGTTACTGAACCAGA              |
| <i>Fkbp5</i>       | qRT-PCR            | TATGCTTATGGCTCGGCTGG             | GAGTATCCCTCGCCTTCCG              |
| <i>Gck</i>         | qRT-PCR            | GAGCCCAGTCGTTGACTCTG             | CTTCTGAGCCTTCTGGGGTG             |
| <i>PPARa</i>       | qRT-PCR            | CCTGAACATCGAGTGTCGAATAT          | GTTCTTCTTCTGAATCTGCAGC           |
| <i>Cebpd</i>       | qRT-PCR            | AGAACCCGCGGCTTCTAC               | GTCGTACATGGCAGGAGTCG             |
| <i>Ddit4</i>       | qRT-PCR            | CTGGTTACAGCCAGTCCCTG             | GAGCCACCTGCATACAACCT             |
| <i>Bmp8a</i>       | qRT-PCR            | TCTGGTCAGTACCACAGTAGC            | AGAGGTGGCACTCAGTTTGG             |
| <i>Gapdh</i>       | qRT-PCR            | AATGCATCCTGCACCACC               | ATGCCAGTGAGCTTCCCG               |
| <i>Fkbp5-1</i>     | ChIP               | GGGCTTTCTCAGTGTGTGT              | GAGAGGGGCTCTGACCTACC             |
| <i>Fkbp5-2</i>     | ChIP               | CTGACTGTTCCCCACAGACAC            | CTGATCGAACAGCTAGTGGCA            |
| <i>Fkbp5-3</i>     | ChIP               | CCCACACATACCTCGTGCTT             | GGGTCCTTCTCAGTCGCTTG             |
| <i>Fkbp5-4</i>     | ChIP               | GACCTCTGTTGGGTACTGCACTC          | CCTGGGGACTTGAACCTAACT            |
| <i>Fkbp5-5</i>     | ChIP               | AGTTAGAGTTCAAGTCCCCAGG           | GGAACCCAAAGGATGGCTGTT            |
| <i>Fkbp5-6</i>     | ChIP               | CAGTCAGCTTCCCTCCATCCC            | GTGCACTGCCTATGCAAATGA            |
| <i>KLF15-gRNA1</i> | CRSPR-Cas9         | caccgTCATCCTCCGAGATGGGCGA        | aaacTCGCCCATCTCGGAGGATGAC        |
| <i>KLF15-gRNA2</i> | CRSPR-Cas9         | caccgTCTGCAGTAGCACCGGCACG        | aaacCGTGCCGGTGCTACTGCAGAC        |

**Table S4 Antibodies**

| Name                              | Application                            | Source                                                           |
|-----------------------------------|----------------------------------------|------------------------------------------------------------------|
| Anti-KLF15                        | Western blotting: 1:1,000<br>IF: 1:200 | Abcam (ab185958)                                                 |
| Anti-Myogenin (F5D)               | IF: 1:100                              | Abcam (ab1835)                                                   |
| Anti-Embryonic Myosin Heavy Chain | IF: 1:50                               | DSHB (developmental studies Hybridoma Bank), (F1.652), AB_528358 |
| Anti-Myosin Heavy Chain           | IF: 1:50<br>Western blotting: 1:1,000  | DSHB (developmental studies Hybridoma Bank), (MF 20), AB_2147781 |
| Anti-Laminin                      | IF: 1:200                              | Sigma (L9393)                                                    |
| Anti-Pax7                         | IF: 1: 50                              | DSHB (developmental studies Hybridoma Bank), AB_528428           |
| Anti-Fkbp5                        | Western blotting: 1:1,000              | Cell Signaling Technology (#8245)                                |
| Anti-Flag                         | ChIP: 2ug/ChIP                         | Sigma                                                            |
| Histone                           | ChIP: 10ul/ChIP                        | Cell Signaling Technology (#4620)                                |
| Anti-WGA                          | IF: 1:100                              | Sigma (L4895)                                                    |
| Anti-GAPDH                        | Western blotting: 1:1,000              | Cell Signaling Technology (#2118)                                |
